# Supplementary material
Source: PubMed Central journal article supplement (PMC4469181)
Supplement: NIHMS696819-supplement-Suppporting_Information.pdf [file NIHMS696819-supplement-Suppporting_Information.pdf]

# Supporting Information:

## Nitrogen Oxide Atom-Transfer Redox Chemistry; Mechanism of NO<sub>(g)</sub> to Nitrite Conversion Utilizing $\mu$ -oxo Heme-Fe<sup>III</sup>-O-Cu<sup>II</sup>(L) Constructs

Shabnam Hematian,<sup>†,§</sup> Isabell Kenkel,<sup>†,§</sup> Tatyana E. Shubina,<sup>†</sup> Maximilian Dürr,<sup>†</sup> Jeffrey J. Liu,<sup>†</sup> Maxime A. Siegler,<sup>†</sup> Ivana Ivanovic-

Burmazovic,<sup>\*,†</sup> Kenneth D. Karlin<sup>\*,†</sup>

<sup>†</sup> Department of Chemistry, Johns Hopkins University, Baltimore, Maryland 21218, United States

<sup>§</sup> Department of Chemistry and Pharmacy, University of Erlangen-Nürnberg, Erlangen 91058, Germany

### Contents:

#### 1. Reaction of [(F<sub>8</sub>)Fe<sup>III</sup>-O-Cu<sup>II</sup>(L)][B(C<sub>6</sub>F<sub>5</sub>)<sub>4</sub>] (L = TMPA, AN or MePY2) with NO<sub>(g)</sub>.

- **Figure S1.** Comparison of molecular structures of [(F<sub>8</sub>)Fe<sup>III</sup>-O-Cu<sup>II</sup>(tmpa)]<sup>+</sup> and [(TMPP)Fe<sup>III</sup>-O-Cu<sup>II</sup>(tmpa)]<sup>+</sup>.
- **Figure S2.** UV-vis spectra of the reaction of [(F<sub>8</sub>)Fe<sup>III</sup>-O-Cu<sup>II</sup>(tmpa)][B(C<sub>6</sub>F<sub>5</sub>)<sub>4</sub>] or [(F<sub>8</sub>)Fe<sup>III</sup>-O-Cu<sup>II</sup>(AN)][B(C<sub>6</sub>F<sub>5</sub>)<sub>4</sub>] with NO<sub>(g)</sub> in acetone at RT.
- **Figure S3.** EPR spectrum of the reaction of [(F<sub>8</sub>)Fe<sup>III</sup>-O-Cu<sup>II</sup>(AN)][B(C<sub>6</sub>F<sub>5</sub>)<sub>4</sub>] with NO<sub>(g)</sub> in MeCN/toluene (1:1) at 20 K.
- **Figure S4.** EPR spectrum of the reaction of [(F<sub>8</sub>)Fe<sup>III</sup>-O-Cu<sup>II</sup>(MePY2)][B(C<sub>6</sub>F<sub>5</sub>)<sub>4</sub>] with NO<sub>(g)</sub> in acetone at 12 K.

#### 2. Reaction of [(TMPP)Fe<sup>III</sup>-O-Cu<sup>II</sup>(tmpa)][B(C<sub>6</sub>F<sub>5</sub>)<sub>4</sub>] with NO<sub>(g)</sub>.

- **Figure S5.** UV-vis spectra of the reaction of [(TMPP)Fe<sup>III</sup>-O-Cu<sup>II</sup>(tmpa)][B(C<sub>6</sub>F<sub>5</sub>)<sub>4</sub>] with NO<sub>(g)</sub> in acetone at RT.
- **Figure S6.** EPR spectrum of the reaction of [(TMPP)Fe<sup>III</sup>-O-Cu<sup>II</sup>(tmpa)][B(C<sub>6</sub>F<sub>5</sub>)<sub>4</sub>] with NO<sub>(g)</sub> in acetone and MeTHF at 12 K.
- **Figure S7.** UV-vis spectra of [(TMPP)Fe<sup>III</sup>(NO)](SbF<sub>6</sub>) and (TMPP)Fe<sup>III</sup>(NO)(NO<sub>2</sub>) in acetone at -20 °C.
- **Figure S8.** Eyring plot for the final step, slow dissociation of the “intermediate”, [(NO)(TMPP)Fe<sup>II</sup>(NO<sub>2</sub>)-Cu<sup>II</sup>(tmpa)][B(C<sub>6</sub>F<sub>5</sub>)<sub>4</sub>] to final products in acetone.
- **Figure S9.** UV-vis spectrum of [(NO)(TMPP)Fe<sup>II</sup>(NO<sub>2</sub>)-Cu<sup>II</sup>(tmpa)][B(C<sub>6</sub>F<sub>5</sub>)<sub>4</sub>] in MeTHF generated from cooling a 1:1 mixture of (TMPP)Fe<sup>II</sup>(NO) and [(tmpa)Cu<sup>II</sup>(NO<sub>2</sub>)][B(C<sub>6</sub>F<sub>5</sub>)<sub>4</sub>] to -125 °C.
- **Figure S10.** EPR spectrum of the “intermediate” of the reaction of [(TMPP)Fe<sup>III</sup>-O-Cu<sup>II</sup>(tmpa)][B(C<sub>6</sub>F<sub>5</sub>)<sub>4</sub>] with NO<sub>(g)</sub> in MeTHF prepared at -80 °C recorded at 12 K.
- **Figure S11.** EPR spectra and simulated plots for product mixture and the “intermediate” of the reaction of [(TMPP)Fe<sup>III</sup>-O-Cu<sup>II</sup>(tmpa)][B(C<sub>6</sub>F<sub>5</sub>)<sub>4</sub>] with NO<sub>(g)</sub>.
- **Table S1.** Observed rate constants for the first and second reaction steps as a function of temperature and concentration.
- **Figure S12.** Kinetic traces with a two-exponential fit for the reaction of [(TMPP)Fe<sup>III</sup>-O-Cu<sup>II</sup>(tmpa)][B(C<sub>6</sub>F<sub>5</sub>)<sub>4</sub>] with 2.3 mM NO at -60 °C in acetone monitored at different wavelengths.
- **Figure S13.** Eyring plots for the forward and reverse reactions for the first step, reaction of [(TMPP)Fe<sup>III</sup>-O-Cu<sup>II</sup>(tmpa)]<sup>+</sup> with the first NO<sub>(g)</sub>.
- **Figure S14.** Eyring plot for the forward reaction of the second step, binding of the second NO<sub>(g)</sub>.
- **Figure S15.** Absorbance at 545 nm (at the end of the first reaction step) as a function of NO<sub>(g)</sub> concentration at -74 °C.
- **Figure S16.** Mass spectrum of the  $\mu$ -oxo compound, [(TMPP)Fe<sup>III</sup>-O-Cu<sup>II</sup>(tmpa)]<sup>+</sup> in acetone at -60 °C.
- **Figure S17.** Mass spectrum of [(TMPP)Fe<sup>III</sup>-O-Cu<sup>II</sup>(tmpa)]<sup>+</sup> in acetone 20 min after bubbling with NO<sub>(g)</sub> at -60 °C.
- **Figure S18.** SOMO of the *mono*-NO adduct.
- **Figure S19.** Optimized geometry of *bis*-NO complex.
- **Figure S20.** Optimized geometry of [(tmpa)Cu<sup>II</sup>(NO<sub>2</sub>)]<sup>+</sup> complex.
- **Figure S21.** Optimized geometry of (TMPP)Fe<sup>II</sup>(NO) complex.

### 3. $[(\text{TMPP})\text{Fe}^{\text{III}}(\text{THF})_2](\text{SbF}_6)$ .

- **Figure S22.** Crystal Structure of  $[(\text{TMPP})\text{Fe}^{\text{III}}(\text{THF})_2]^+$  and selected bond lengths and angles.
- **Figure S23.** UV-vis spectra of  $[(\text{TMPP})\text{Fe}^{\text{III}}(\text{THF})_2](\text{SbF}_6)$  in acetone and MeCN at RT.
- **Figure S24.** EPR spectrum of  $[(\text{TMPP})\text{Fe}^{\text{III}}(\text{THF})_2](\text{SbF}_6)$  in THF/MeTHF (1:4) at 12 K.

### 4. Computational details

- **Table S2.** Absolute energies of studied compounds at the OLYP/6-311+G(d,p) level
- **Table S3.** Absolute energies and zero-point correction energy of studied compounds at the BP86/6-31G(d) level
- **XYZ coordinates**

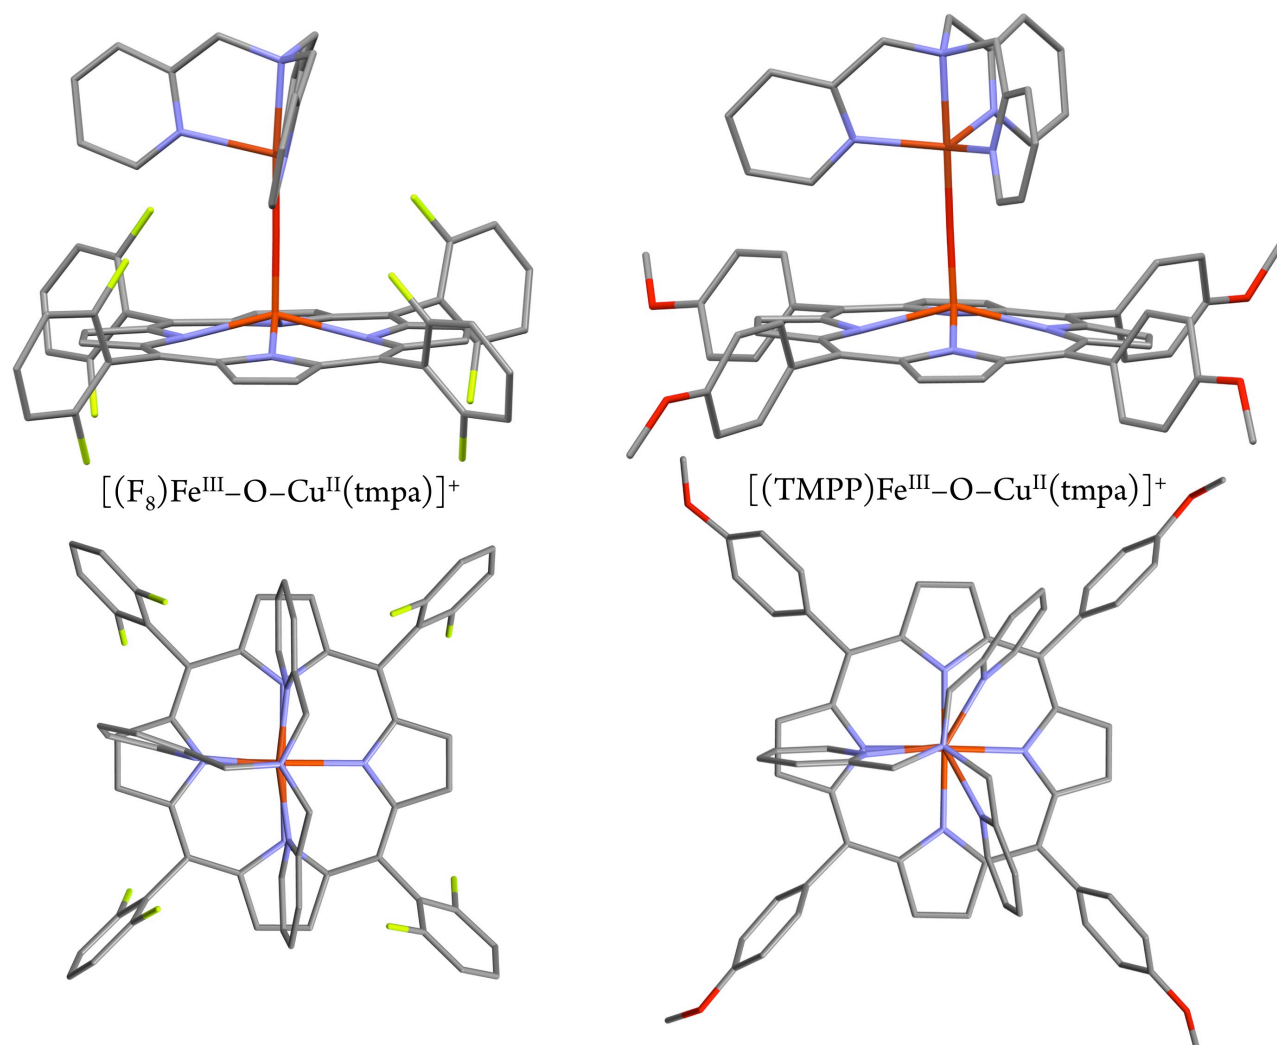

**Figure S1.** Molecular structures (side and top views) of the oxo-bridged heteronuclear cations  $[(\text{F}_8)\text{Fe}^{\text{III}}-\text{O}-\text{Cu}^{\text{II}}(\text{tmpa})]^+$  (adapted from text reference #14) and  $[(\text{TMPP})\text{Fe}^{\text{III}}-\text{O}-\text{Cu}^{\text{II}}(\text{tmpa})]^+$  showing that the cupric center adapted different geometries; in the former compound Cu(II) adjusts to a distorted square pyramidal geometry ( $\tau = 0.3$ ) while in the latter it is present in a trigonal bipyramidal arrangement ( $\tau = 0.9$ ). All the hydrogen atoms are omitted for clarity.

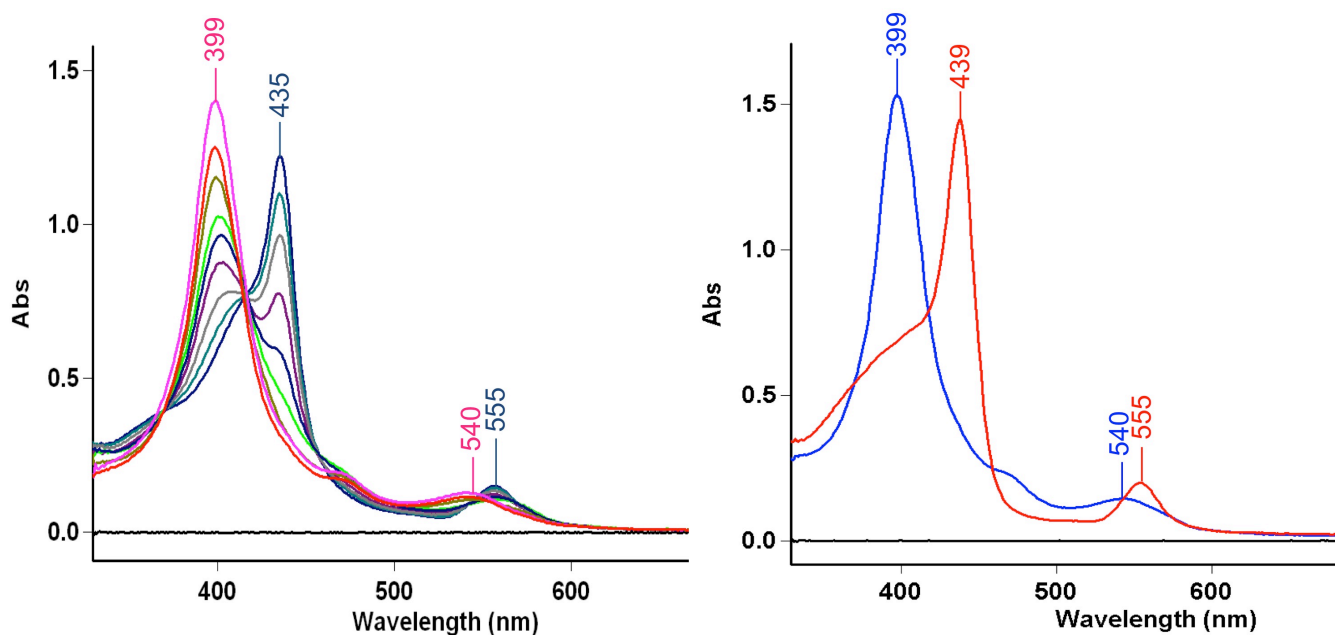

**Figure S2.** UV-vis spectra of: *Left*) (adapted from text reference # 11)  $[(F_8)Fe^{III}-O-Cu^{II}(tmpa)][B(C_6F_5)_4]$  (blue),  $(F_8)Fe^{II}(NO)$  (red) generated from addition of 1 mL of  $NO(g)$ . Addition of second mL of  $NO(g)$  to the solution resulted in completion of the reaction (purple) 10  $\mu M$  in acetone at RT. *Right*)  $[(F_8)Fe^{III}-O-Cu^{II}(AN)][B(C_6F_5)_4]$  (red) and  $(F_8)Fe^{II}(NO)$  (blue) immediately generated after addition of 1 mL  $NO(g)$  into the  $\mu$ -oxo complex solution 10  $\mu M$  in acetone at RT.

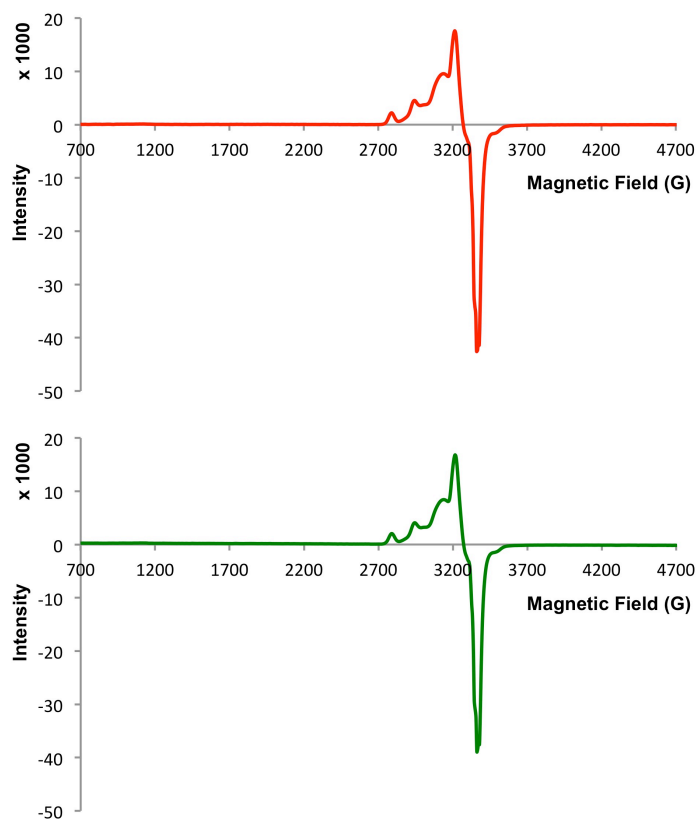

**Figure S3.** EPR spectrum comparison between the reaction mixture and an authentic sample: the products of the reaction of  $NO(g)$  and  $[(F_8)Fe^{III}-O-Cu^{II}(AN)][B(C_6F_5)_4]$ , giving signals of  $(F_8)Fe^{II}(NO)$  and Cu(II) (red); an authentic sample of a 1:1 mixture of  $(F_8)Fe^{II}(NO)$  and  $[(AN)Cu^{II}(NO_2)](CF_3SO_3)$  (green) 1 mM in MeCN/toluene (1:1) at 20 K.

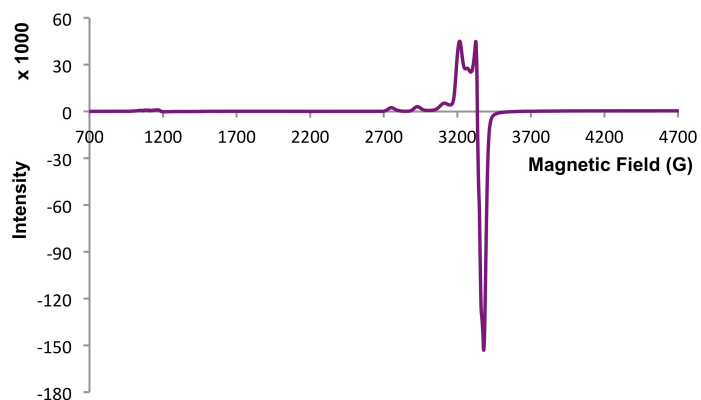

**Figure S4.** EPR spectrum of the products of the reaction of  $\text{NO}_{(g)}$  and  $[(\text{F}_8)\text{Fe}^{\text{III}}-\text{O}-\text{Cu}^{\text{II}}(\text{MePY}2)][\text{B}(\text{C}_6\text{F}_5)_4]$  (purple), giving signals of  $(\text{F}_8)\text{Fe}^{\text{II}}(\text{NO})$  and  $\text{Cu}(\text{II})$  in acetone 2 mM at 12 K.

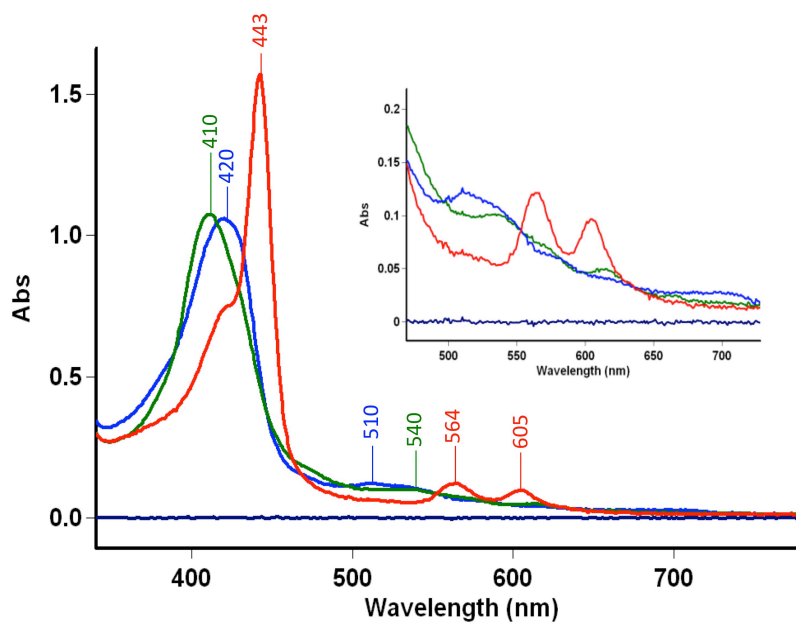

**Figure S5.** UV-vis spectra of  $[(\text{TMPP})\text{Fe}^{\text{III}}-\text{O}-\text{Cu}^{\text{II}}(\text{tmpa})][\text{B}(\text{C}_6\text{F}_5)_4]$  (red) 35  $\mu\text{M}$  in acetone in a 2-mm cuvette at RT, right after addition of 1 mL of  $\text{NO}_{(g)}$  into the solution (blue), after stirring for 4 min forming  $(\text{TMPP})\text{Fe}^{\text{II}}(\text{NO})$  (green).

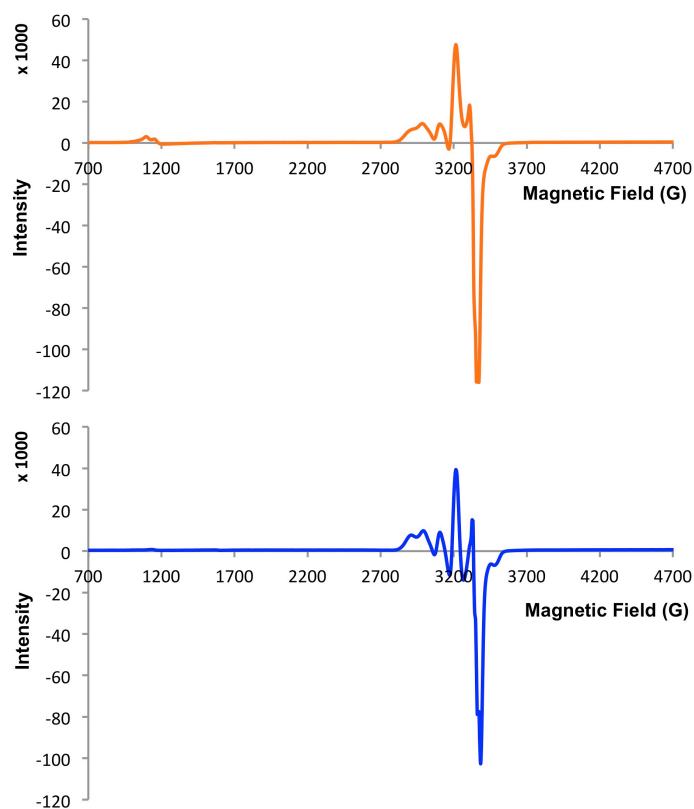

**Figure S6.** EPR spectra of the products of the reaction of  $\text{NO}_{(g)}$  and  $[(\text{TMPP})\text{Fe}^{\text{III}}-\text{O}-\text{Cu}^{\text{II}}(\text{tmpa})][\text{B}(\text{C}_6\text{F}_5)_4]$ , giving signals of  $(\text{TMPP})\text{Fe}^{\text{II}}(\text{NO})$  and  $\text{Cu}(\text{II})$  in acetone (orange) and in MeTHF (blue) 2 mM at 12 K.

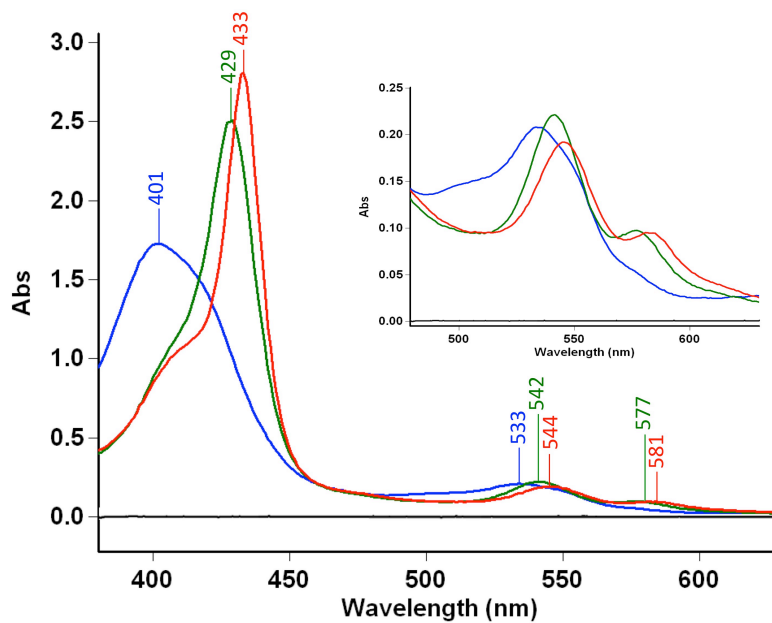

**Figure S7.** UV-vis spectra of  $[(\text{TMPP})\text{Fe}^{\text{III}}(\text{THF})_2]\text{SbF}_6$  (blue) 50  $\mu\text{M}$  in acetone in a 2-mm cuvette at  $-20\text{ }^\circ\text{C}$ , right after addition of 1 mL of  $\text{NO}_{(g)}$  into the solution generating  $(\text{TMPP})\text{Fe}^{\text{III}}(\text{NO})$  (green), after addition of 10 equiv  $(n\text{Bu})_4\text{N}(\text{NO}_2)$  forming  $(\text{TMPP})\text{Fe}^{\text{III}}(\text{NO})(\text{NO}_2)$  (red).

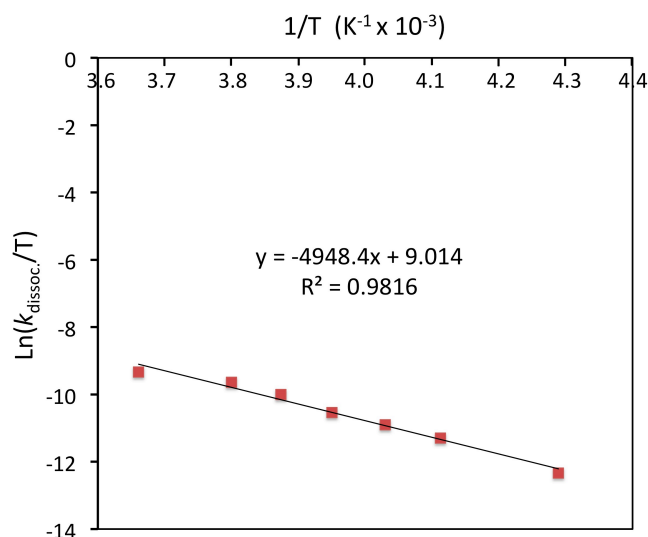

**Figure S8.** Eyring plot,  $\ln(k_{\text{obs}}/T)$  vs  $1/T$ , for the final step, slow dissociation of the “intermediate”,  $[(\text{NO})(\text{TMPP})\text{Fe}^{\text{II}}-(\text{NO}_2)-\text{Cu}^{\text{II}}(\text{tmpa})][\text{B}(\text{C}_6\text{F}_5)_4]$ , generated from reaction of  $[(\text{TMPP})\text{Fe}^{\text{III}}-\text{O}-\text{Cu}^{\text{II}}(\text{tmpa})][\text{B}(\text{C}_6\text{F}_5)_4]$  with  $\text{NO}_{(\text{g})}$  to the two final Cu-nitrite and heme- $\text{Fe}^{\text{II}}(\text{NO})$  products. The rate constants ( $k_{\text{dissoc.}}$ ) were obtained from monitoring of the decay of the 433 nm intermediate in acetone at 0, -10, -15, -20, -25, -30, -40 °C. From the plot, activation parameters for the final step were obtained,  $\Delta S^{\ddagger}_{\text{dissoc.}} = R(\text{intercept} - \ln k_{\text{B}}/h) = -123 \pm 2 \text{ J mole}^{-1}\text{K}^{-1}$  and  $\Delta H^{\ddagger}_{\text{dissoc.}} = -R(\text{slope}) = +41,141 \pm 100 \text{ J mol}^{-1}$ .

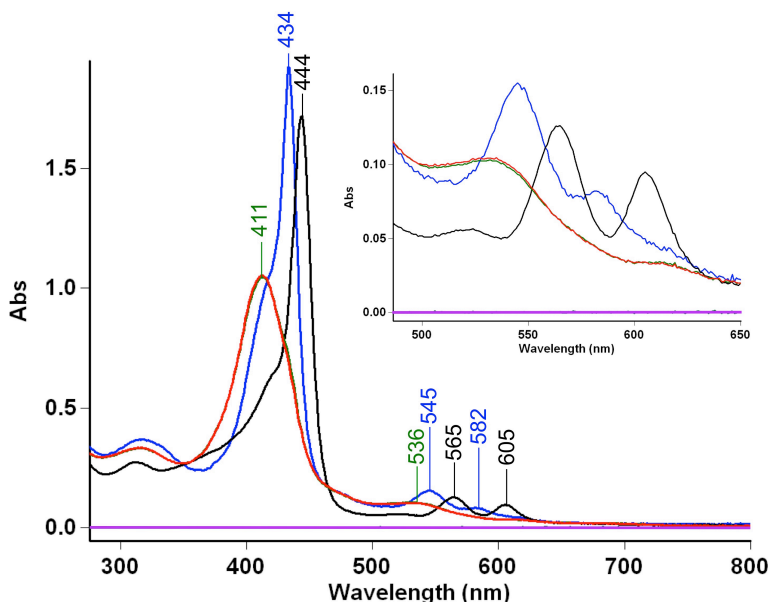

**Figure S9.** UV-vis spectra of  $[(\text{TMPP})\text{Fe}^{\text{III}}-\text{O}-\text{Cu}^{\text{II}}(\text{tmpa})][\text{B}(\text{C}_6\text{F}_5)_4]$  (black) 35  $\mu\text{M}$  in MeTHF in a 2-mm cuvette at RT, after addition of 1 mL of  $\text{NO}_{(\text{g})}$  into the solution forming final products,  $(\text{TMPP})\text{Fe}^{\text{II}}(\text{NO})$  and  $[(\text{tmpa})\text{Cu}^{\text{II}}(\text{NO}_2)][\text{B}(\text{C}_6\text{F}_5)_4]$  (green). The excess  $\text{NO}_{(\text{g})}$  was then removed and the sample was cooled to -125 °C generating a new species formulated as  $[(\text{NO})(\text{TMPP})\text{Fe}^{\text{II}}-(\text{NO}_2)-\text{Cu}^{\text{II}}(\text{tmpa})][\text{B}(\text{C}_6\text{F}_5)_4]$  (blue). Warming up to RT resulted the reformation of initial spectrum of the final products (red).

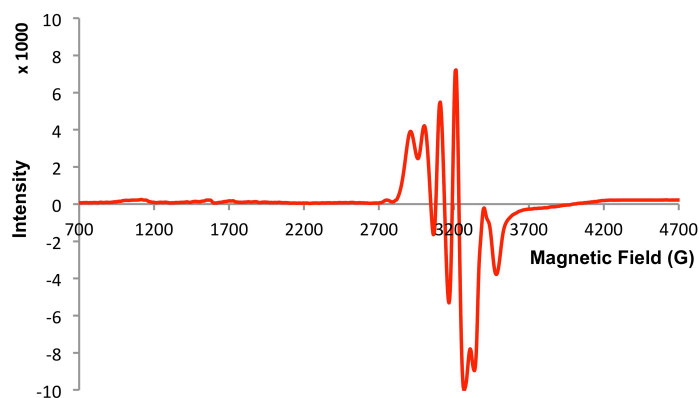

**Figure S10.** EPR spectrum of the “intermediate” for the reaction of  $\text{NO}_{(g)}$  and  $[(\text{TMPP})\text{Fe}^{\text{III}}-\text{O}-\text{Cu}^{\text{II}}(\text{tmpa})][\text{B}(\text{C}_6\text{F}_5)_4]$  at 12 K giving signals of  $\text{Cu}(\text{II})$  and ferrous heme nitrosyl species, but with a different hyperfine coupling observed in the spectrum of products mixture (Figure S9). Sample was prepared by addition of 1 mL  $\text{NO}_{(g)}$  into the 1 mM solution of  $[(\text{TMPP})\text{Fe}^{\text{III}}-\text{O}-\text{Cu}^{\text{II}}(\text{tmpa})][\text{B}(\text{C}_6\text{F}_5)_4]$  in MeTHF at  $-80^\circ\text{C}$  (dry ice-acetone bath). Then excess  $\text{NO}_{(g)}$  was removed via vacuum/Ar-purge cycles and the EPR sample was frozen in liquid nitrogen prior to measurement.

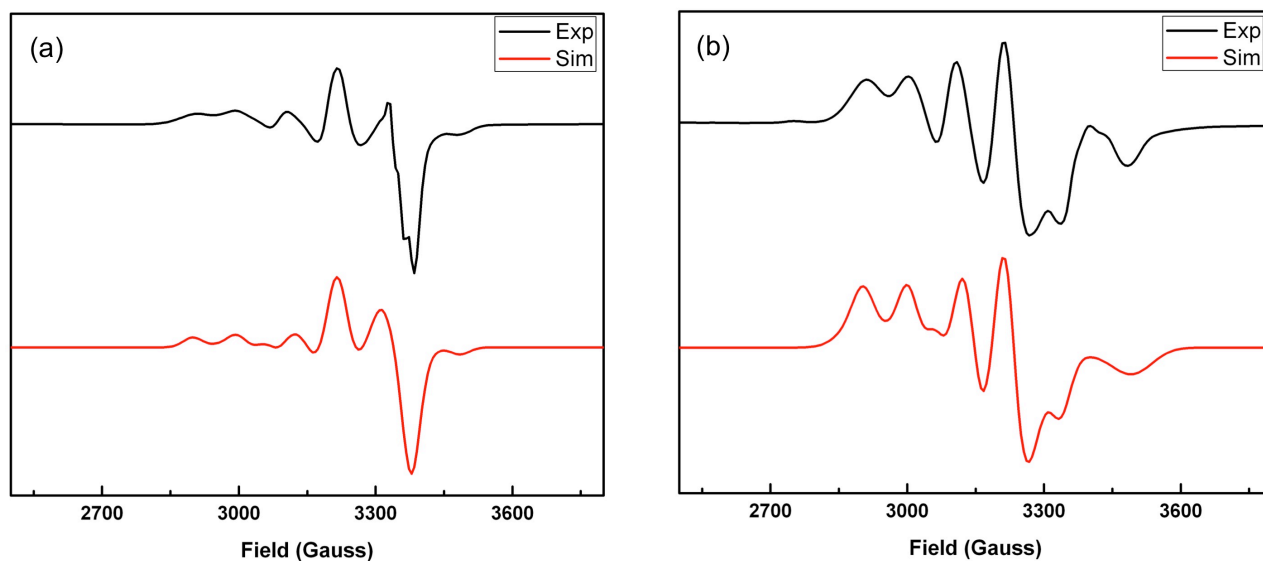

**Figure S11.** Experimental (black) and simulated (red) spectra (for the reaction of  $\text{NO}_{(g)}$  with  $[(\text{TMPP})\text{Fe}^{\text{III}}-\text{O}-\text{Cu}^{\text{II}}(\text{tmpa})][\text{B}(\text{C}_6\text{F}_5)_4]$ ) of the product species (a)  $g_{1,\text{Cu}} = 2.153$ ,  $g_{2,\text{Cu}} = 2.195$ ,  $g_{3,\text{Cu}} = 1.987$ ,  $A_{1,\text{Cu}} = 82.1$  G,  $A_{2,\text{Cu}} = 115$  G,  $A_{3,\text{Cu}} = 69.2$  G,  $g_{1,\text{FeNO}} = 2.094$ ,  $g_{2,\text{FeNO}} = 2.009$ ,  $g_{3,\text{FeNO}} = 1.993$ ,  $A_{1,\text{FeNO}} = 10.3$  G,  $A_{2,\text{FeNO}} = 22.8$  G,  $A_{3,\text{FeNO}} = 7.1$  G and the “intermediate” species (b)  $g_{1,\text{Cu}} = 2.161$ ,  $g_{2,\text{Cu}} = 2.187$ ,  $g_{3,\text{Cu}} = 2.056$ ,  $A_{1,\text{Cu}} = 73.1$  G,  $A_{2,\text{Cu}} = 110$  G,  $A_{3,\text{Cu}} = 51.2$  G,  $g_{1,\text{FeNO}} = 2.340$ ,  $g_{2,\text{FeNO}} = 1.920$ ,  $g_{3,\text{FeNO}} = 2.066$ ,  $A_{2,\text{NO}} = 18.9$  G,  $A_{2,\text{Nitrite}} = 7.74$  G. EPR conditions: microwave frequency, 9.41 GHz; microwave power, 0.2 mW; modulation frequency, 100 kHz; modulation amplitude, 10 G; temperature, 12 K. EPR simulations were performed using EasySpin v. 4.5.5 (Stoll, S.; Schweiger, A. *J. Magn. Reson.* **2006**, 178, 42; <http://www.easyspin.org>).

**Table S1. Observed Rate Constants for the First Reaction Step ( $k_{1(\text{obs})}$ , Binding of 1<sup>st</sup> NO) and Second Reaction Step ( $k_{2(\text{obs})}$ , Binding of 2<sup>nd</sup> NO) as a Function of Temperature and Concentration.**

| [NO] mM      | Temperature         |                     |                     |                     |                     |                     |                     |
|--------------|---------------------|---------------------|---------------------|---------------------|---------------------|---------------------|---------------------|
|              | -60 °C              |                     | -67 °C              |                     | -74 °C              |                     | -83 °C*             |
|              | $k_{1(\text{obs})}$ | $k_{2(\text{obs})}$ | $k_{1(\text{obs})}$ | $k_{2(\text{obs})}$ | $k_{1(\text{obs})}$ | $k_{2(\text{obs})}$ | $k_{1(\text{obs})}$ |
| <b>0.281</b> | 4.35 ± 0.15         | 0.25 ± 0.02         | 3.11 ± 0.26         | 0.20 ± 0.04         | 1.81 ± 0.26         | 0.16 ± 0.03         | 0.92 ± 0.04         |
| <b>0.563</b> | 6.11 ± 0.66         | 0.45 ± 0.06         | 4.36 ± 0.23         | 0.37 ± 0.03         | 2.34 ± 0.03         | 0.23 ± 0.01         | 1.16 ± 0.03         |
| <b>0.750</b> | 6.72 ± 0.06         | 0.53 ± 0.04         | 4.64 ± 0.26         | 0.50 ± 0.04         | 2.90 ± 0.03         | 0.38 ± 0.02         | 1.38 ± 0.05         |
| <b>1.13</b>  | 9.84 ± 0.86         | 0.82 ± 0.11         | 7.43 ± 0.18         | 0.72 ± 0.05         | 3.66 ± 0.06         | 0.46 ± 0.02         | 1.88 ± 0.10         |
| <b>1.69</b>  | 12.76 ± 0.19        | 1.19 ± 0.03         | 10.33 ± 0.36        | 0.98 ± 0.08         | 4.91 ± 0.13         | 0.77 ± 0.06         | 2.52 ± 0.08         |
| <b>2.25</b>  | 16.19 ± 0.37        | 1.65 ± 0.11         | 12.67 ± 1.47        | 1.51 ± 0.10         | 6.49 ± 0.09         | 1.16 ± 0.15         | 3.22 ± 0.11         |

\* The second step at -83 °C was very slow and  $k_{2(\text{obs})}$  could not be accurately determined.

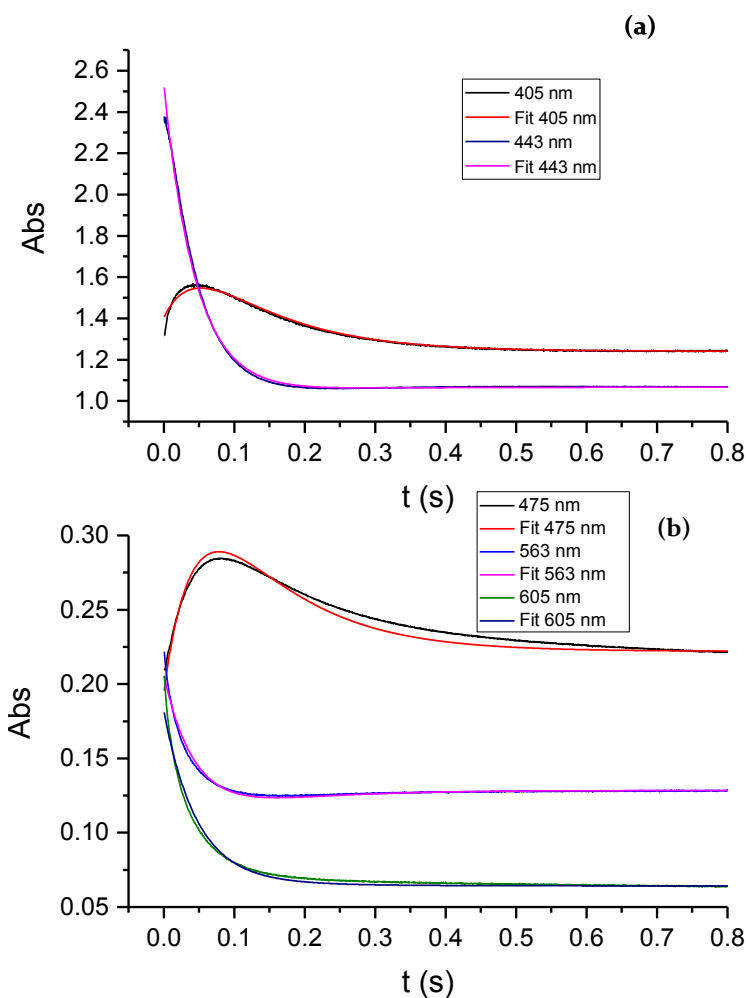

**Figure S12.** Kinetic traces with a two-exponential fit for the reaction of  $[(\text{TMPP})\text{Fe}^{\text{III}}-\text{O}-\text{Cu}^{\text{II}}(\text{tpma})][\text{B}(\text{C}_6\text{F}_5)_4]$  with 2.3 mM NO at -60 °C in acetone monitored (a) at 405 and 443 nm, as well as (b) at 475, 563 and 605 nm.



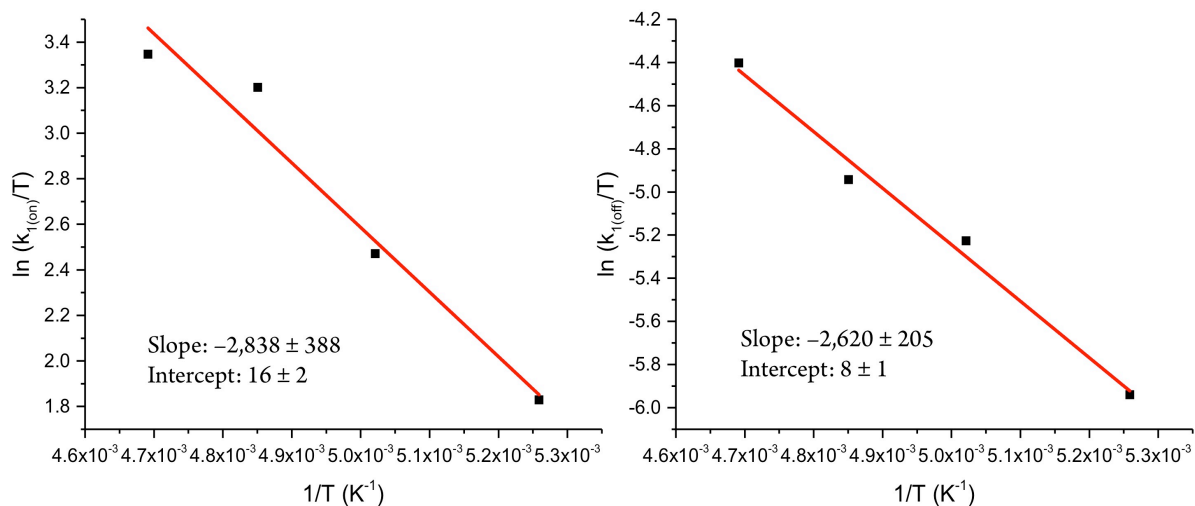

**Figure S13.** Eyring plots ( $\ln(k/T) = -(\Delta H^\ddagger/R)(1/T) + \Delta S^\ddagger/R + \ln(k_b/h)$ ;  $k = k_{1(\text{on})}$  or  $k_{1(\text{off})}$ ) for the forward and reverse reactions for the first reaction step, reaction of  $[(\text{TMPP})\text{Fe}^{\text{III}}-\text{O}-\text{Cu}^{\text{II}}(\text{tmpa})]^+$  with the first  $\text{NO}_{(\text{g})}$ .

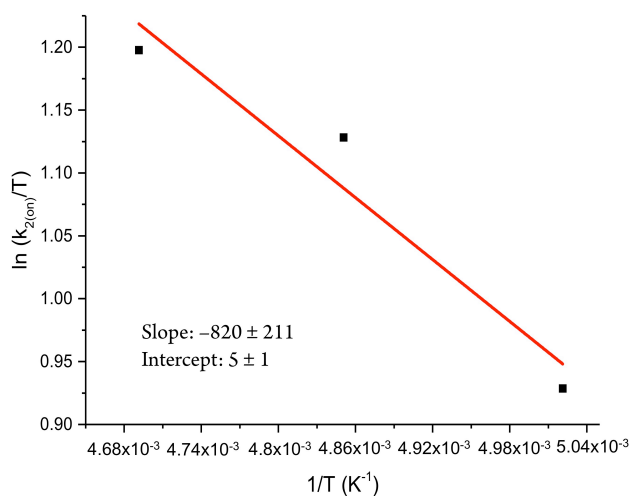

**Figure S14.** Eyring plot ( $\ln(k/T) = -(\Delta H^\ddagger/R)(1/T) + \Delta S^\ddagger/R + \ln(k_b/h)$ ;  $k = k_{2(\text{on})}$ ) for the forward reaction for the second reaction step, binding of the second  $\text{NO}_{(\text{g})}$ .

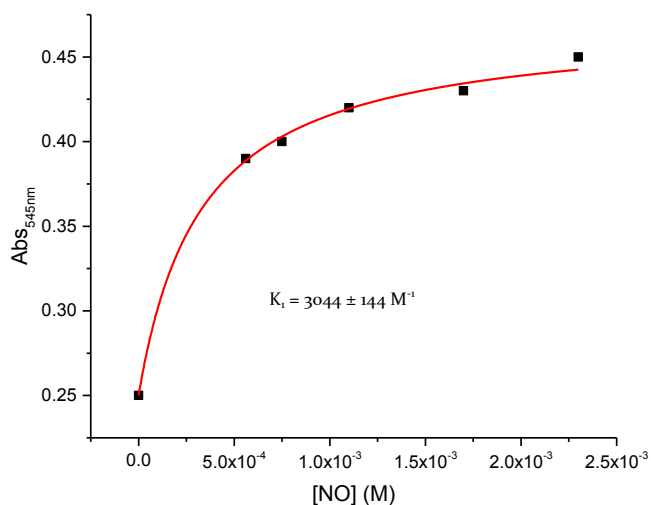

**Figure S15.** Absorbance at 545 nm (at the end of the first reaction step at  $-74^\circ C$ ) as a function of  $NO_{(g)}$  concentration (data fitted by Eq. 1 given in the main text).

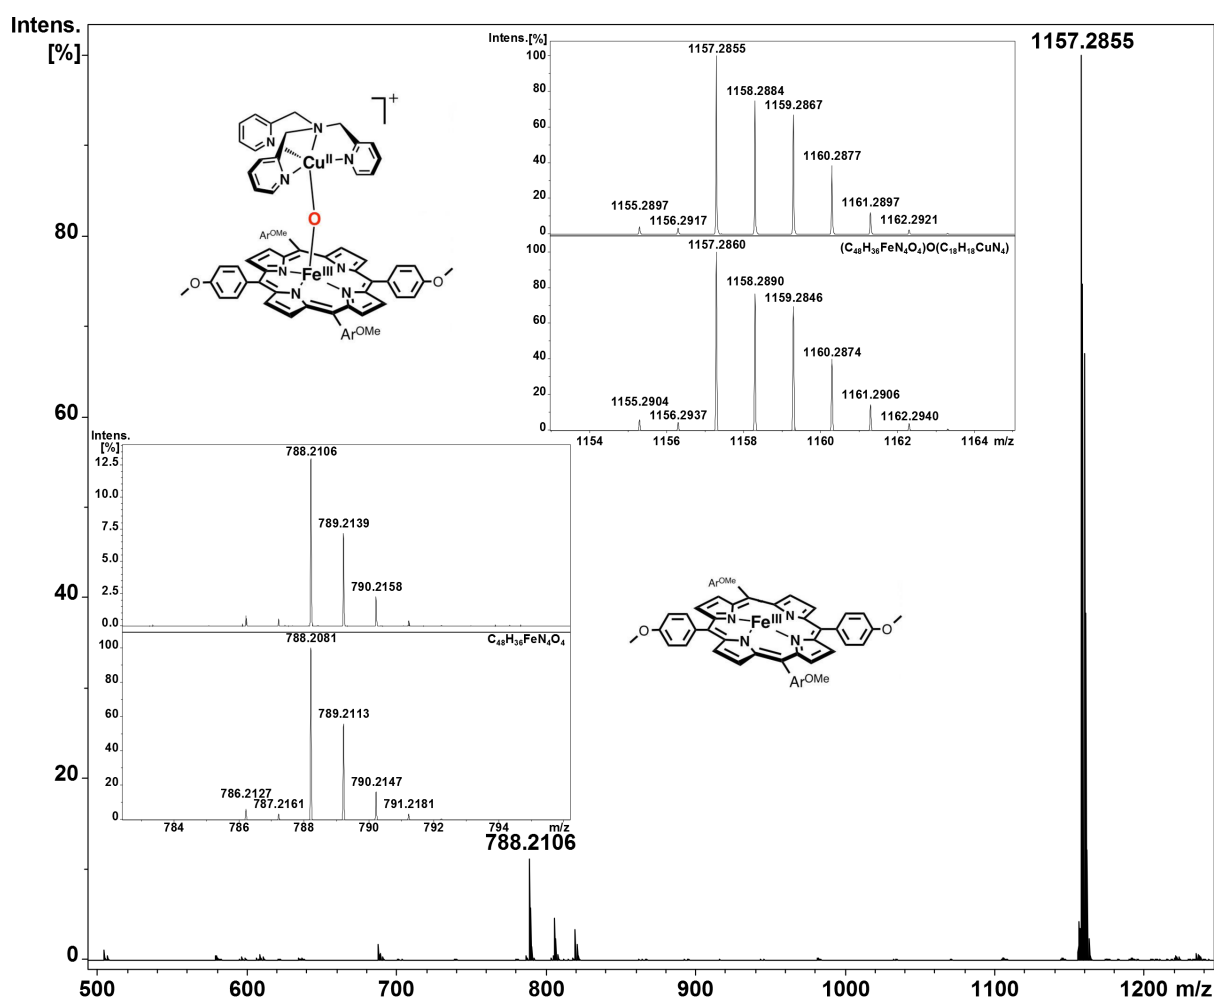

**Figure S16.** Mass spectrum of  $[(TMPP)Fe^{III}-O-Cu^{II}(tmpa)]^+$  in acetone before bubbling with  $NO_{(g)}$ , spray gas temperature  $-60^\circ C$ , dry gas temperature  $-55^\circ C$ ; main species  $m/z = 1157.2855$ , which is assigned to the  $\mu$ -oxo compound.

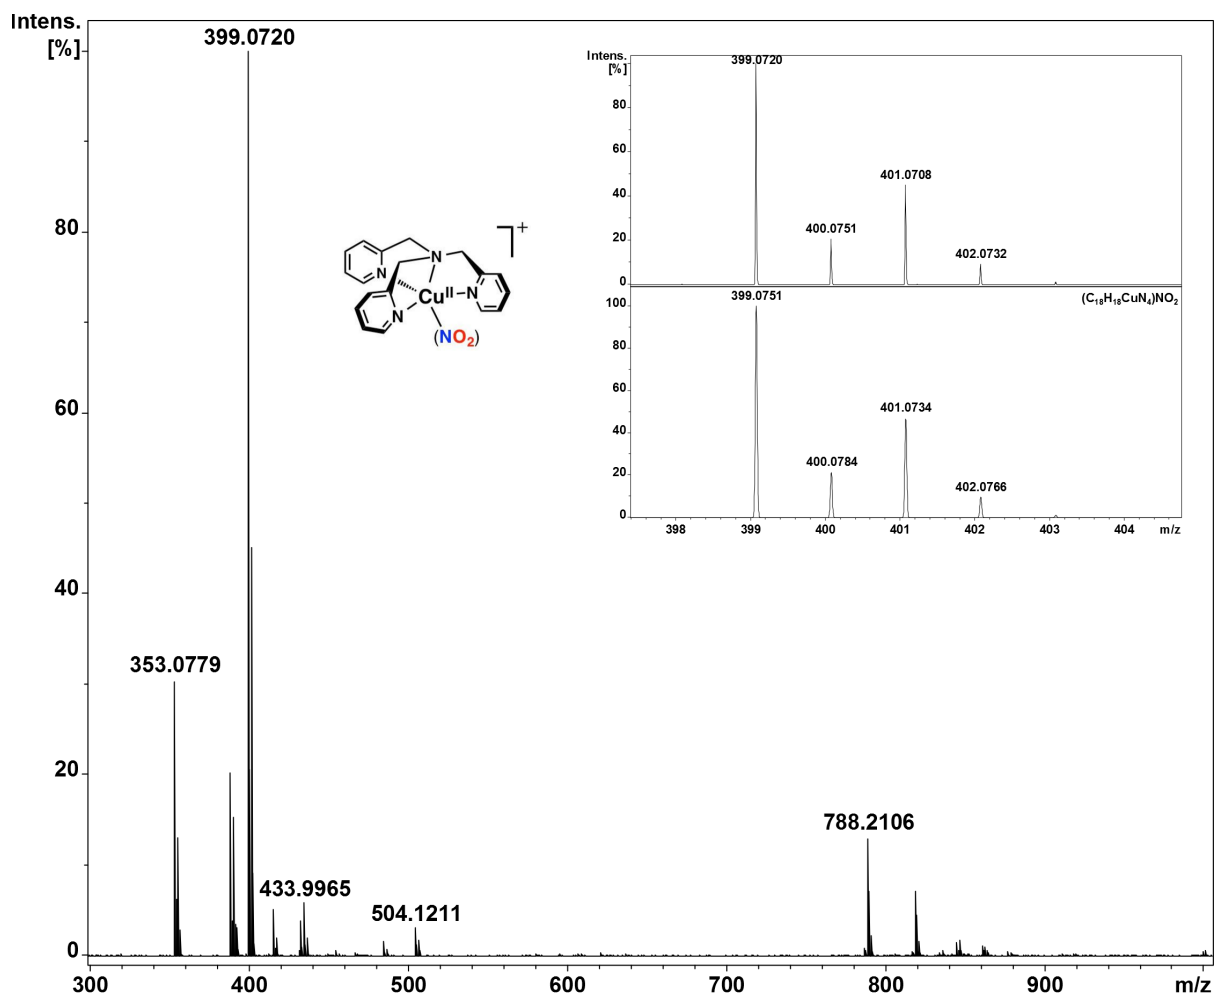

**Figure S17.** Mass spectrum of  $[(\text{TMPP})\text{Fe}^{\text{III}}-\text{O}-\text{Cu}^{\text{II}}(\text{tmpa})]^+$  in acetone 20 min after bubbling with  $\text{NO}_{(\text{g})}$ . Experimental conditions: spray gas temperature  $-60\text{ }^{\circ}\text{C}$ ; dry gas temperature  $-55\text{ }^{\circ}\text{C}$ . (Main species  $m/z = 399.0720$ , which can be assigned to the  $[(\text{tmpa})\text{Cu}^{\text{II}}(\text{NO}_2)]^+$  complex; the ferrous heme nitrosyl  $(\text{TMPP})\text{Fe}^{\text{II}}(\text{NO})$  compound cannot be observed because it is not charged.)

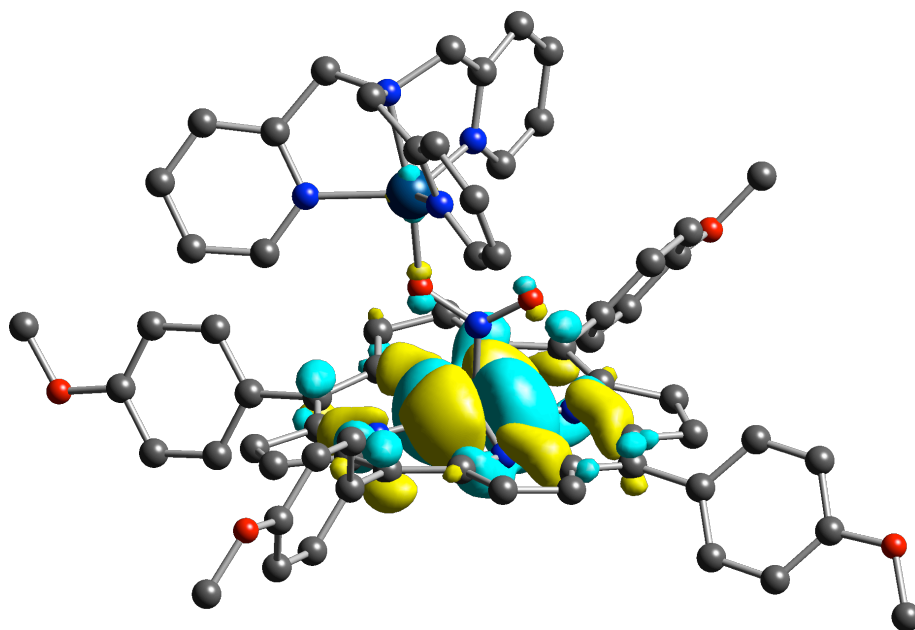

**Figure S18.** SOMO of the *mono*-NO adduct (BP86/6-31G(d)). Isodensity value  $\alpha = 0.02$ .

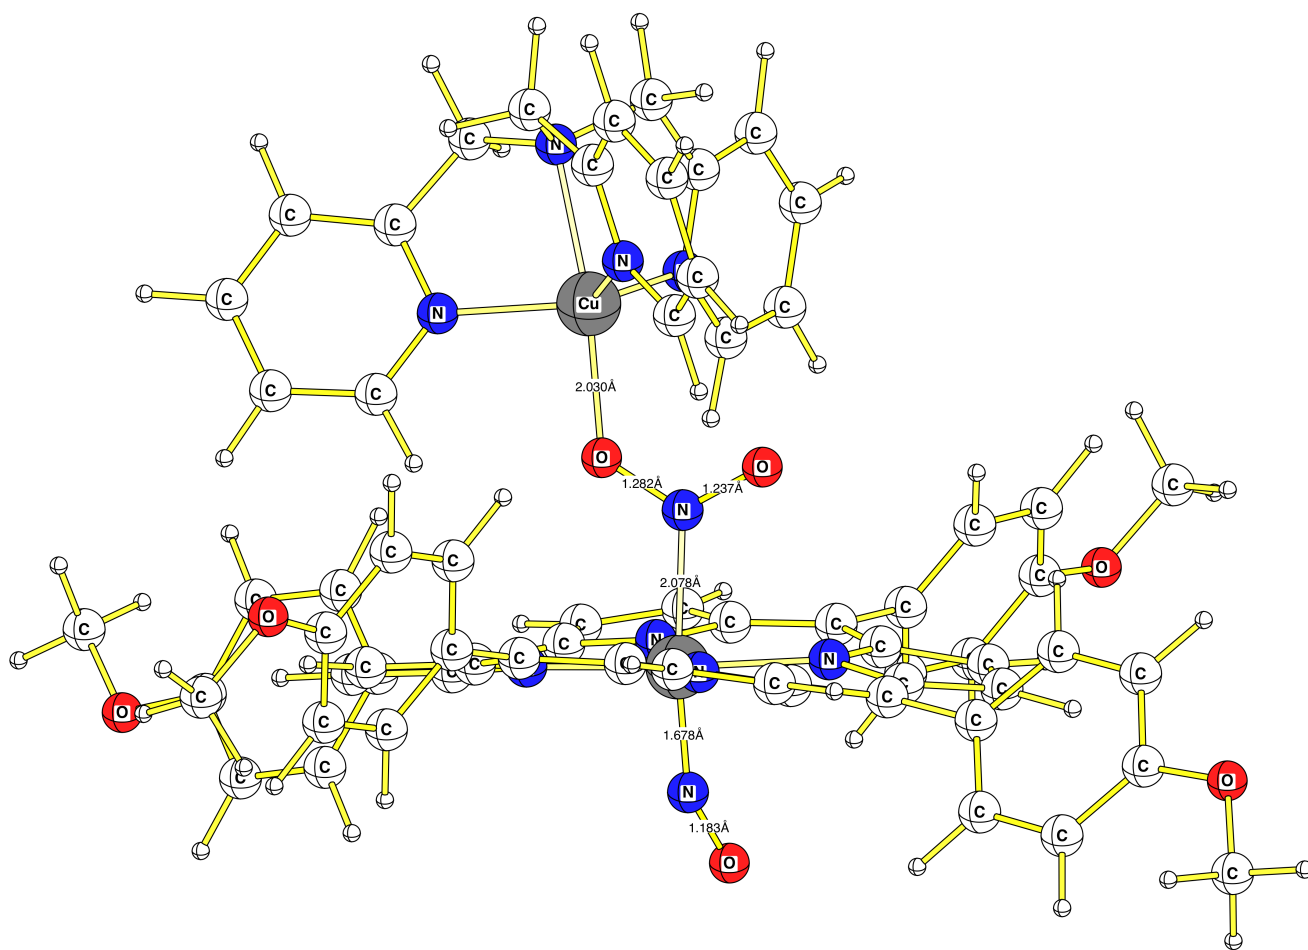

Figure S19. Optimized geometry of the *bis*-NO complex, BP86/6-31G(d).

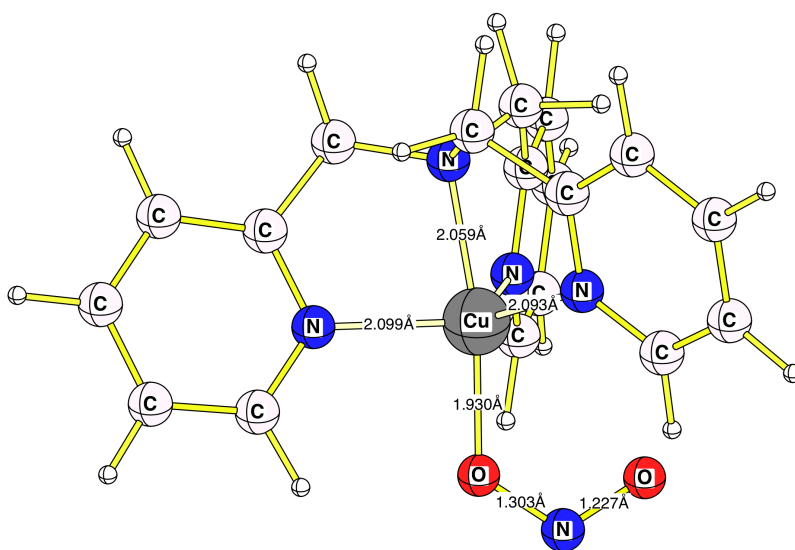

Figure S20. Optimized geometry of  $[(\text{tmpa})\text{Cu}^{\text{II}}(\text{NO}_2)]^+$  complex, BP86/6-31G(d).

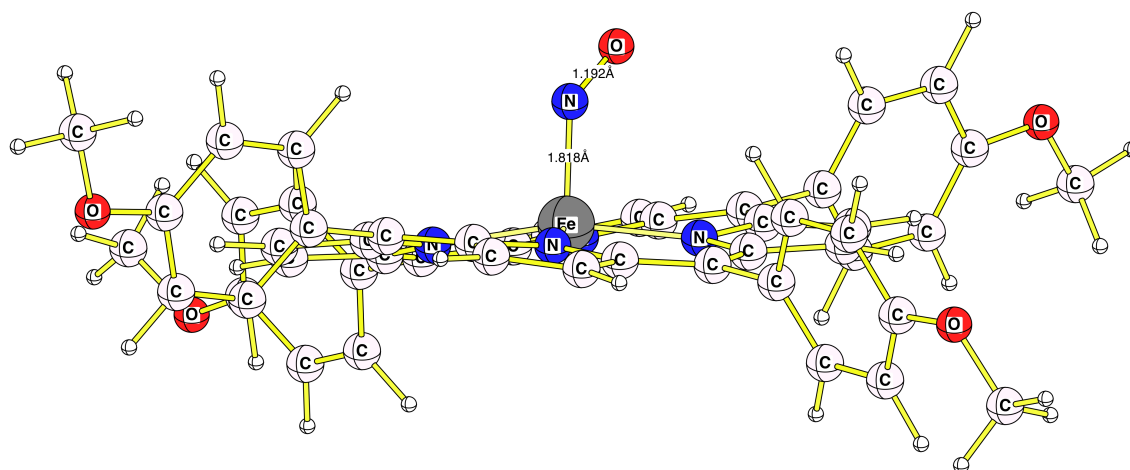

**Figure S21.** Optimized geometry of (TMPP)Fe<sup>II</sup>(NO) complex, BP86/6-31G(d).

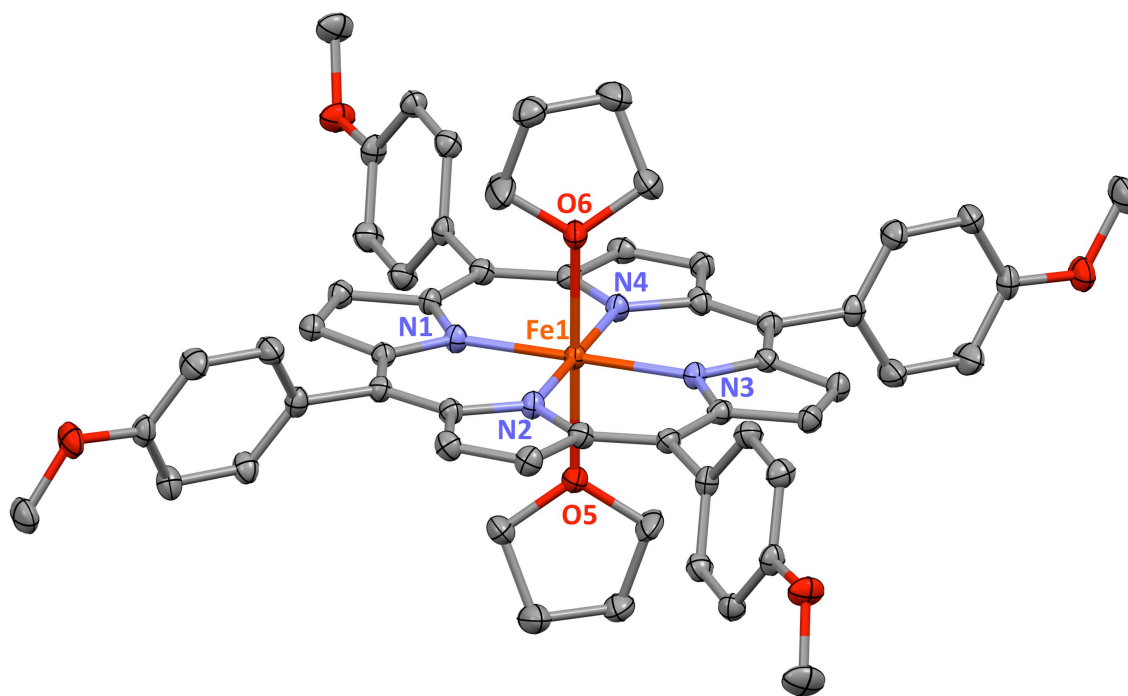

**Figure S22.** Displacement ellipsoid plot (50% probability level) of [(TMPP)Fe<sup>III</sup>(THF)<sub>2</sub>]<sup>+</sup>, showing the atom-labeling scheme. Lattice solvent molecules and hydrogen atoms have been omitted for the sake of clarity. Selected bond lengths (Å) and angles (deg): Fe1–O6, 2.156(2); Fe1–O5, 2.154(2); Fe1–N1, 2.015(3); Fe1–N2, 2.025(3); Fe1–N3, 2.032(3); Fe1–N4, 2.014(3); O5–Fe1–O6, 179.68(10); N1–Fe1–N2, 89.40(10); N1–Fe1–N3, 179.70(11); N1–Fe1–N4, 90.98(10); N1–Fe1–O5, 90.58(9); N1–Fe1–O6, 89.67(9); N2–Fe1–N3, 90.30(10); N2–Fe1–N4, 179.26(10); N2–Fe1–O5, 90.68(9); N2–Fe1–O6, 89.13(9); N3–Fe1–N4, 89.32(10); N3–Fe1–O5, 89.38(9); N3–Fe1–O6, 90.37(9); N4–Fe1–O5, 89.96(9); N4–Fe1–O6, 90.24(9).

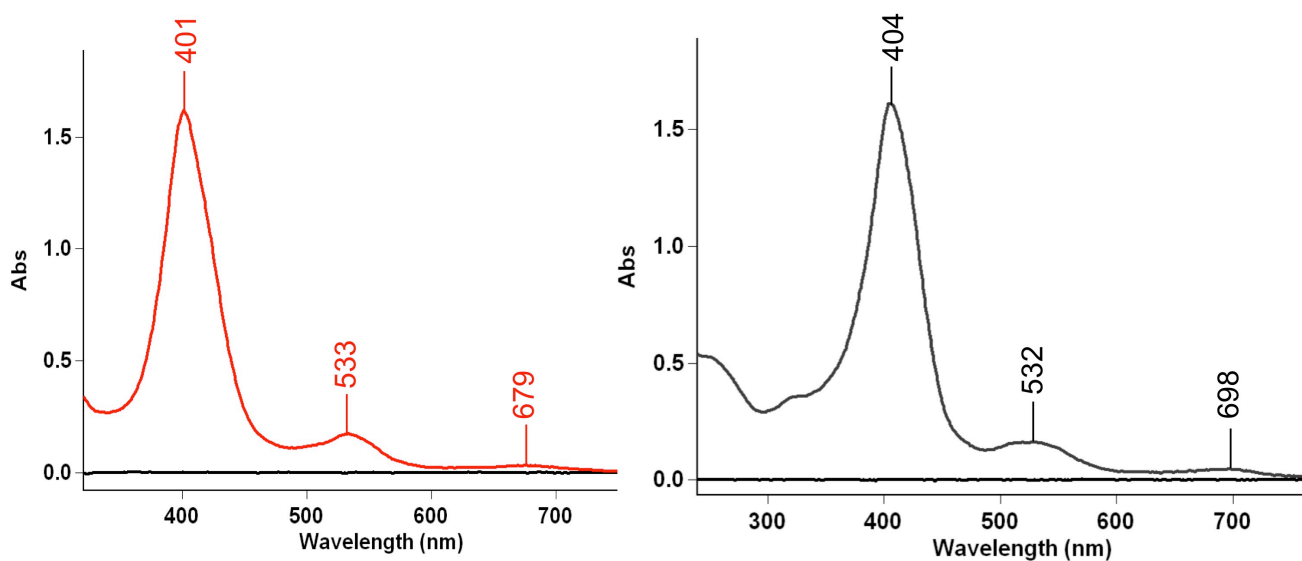

**Figure S23.** UV-vis spectra of  $[(\text{TMPP})\text{Fe}^{\text{III}}(\text{THF})_2](\text{SbF}_6)$  in acetone (left, red) and MeCN (right, black) 50  $\mu\text{M}$  in a 2-mm cuvette at RT.

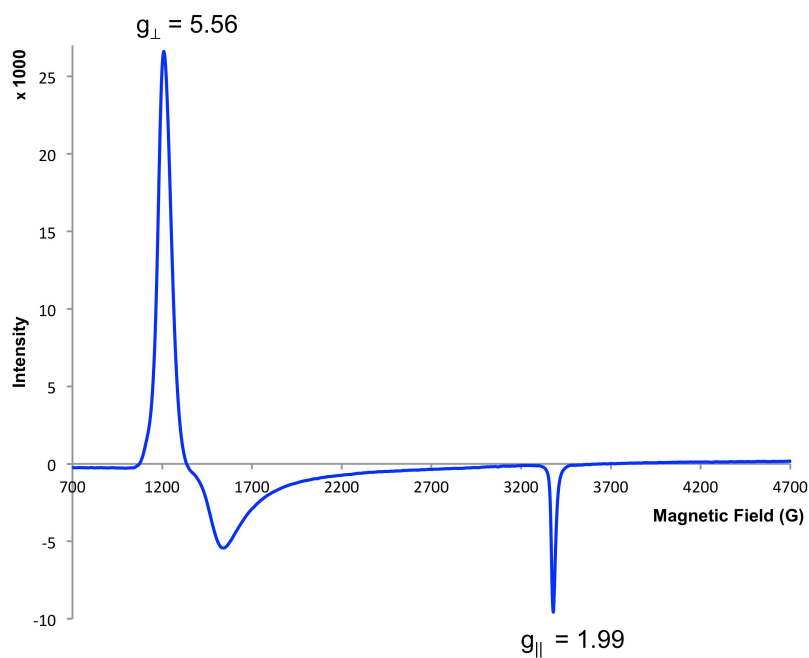

**Figure S24.** EPR spectrum of  $[(\text{TMPP})\text{Fe}^{\text{III}}(\text{THF})_2](\text{SbF}_6)$  (1 mM) in THF/MeTHF (1:4) at 12 K.

## Computational details

All structures were fully optimized in the presence of solvent (acetone, PCM model) within Gaussian 09 program.<sup>1</sup> The BP86<sup>2,3</sup> functional with the 6-31G(d)<sup>4-18</sup> basis sets for all the atoms were used. In all case the nature of stationary points were checked (full optimization, NIMag= 0 for minima and NIMag=1 – for transition state).

Various spin states of the complexes were considered in our calculations (high spin (HS), intermediate spin (IS) and low spin (LS)). Single-point energy evaluation was performed at the OLYP<sup>19-22</sup>/6-311+G(d,p) level of theory, including solvent correction via PCM model.

- Gaussian 09 Revision A.2 Frisch, M. J.; Trucks, G. W.; Schlegel, H. B.; Scuseria, G. E.; Robb, M. A.; Cheeseman, J. R.; Scalmani, G.; Barone, V.; Mennucci, B.; Petersson, G. A.; Nakatsuji, H.; Caricato, M.; Li, X.; Hratchian, H. P.; Izmaylov, A. F.; Bloino, J.; Zheng, G.; Sonnenberg, J. L.; Hada, M.; Ehara, M.; Toyota, K.; Fukuda, R.; Hasegawa, J.; Ishida, M.; Nakajima, T.; Honda, Y.; Kitao, O.; Nakai, H.; Vreven, T.; Montgomery, Jr., J. A.; Peralta, J. E.; Ogliaro, F.; Bearpark, M.; Heyd, J. J.; Brothers, E.; Kudin, K. N.; Staroverov, V. N.; Kobayashi, R.; Normand, J.; Raghavachari, K.; Rendell, A.; Burant, J. C.; Iyengar, S. S.; Tomasi, J.; Cossi, M.; Rega, Millam, N. J.; Klene, M.; Knox, J. E.; Cross, J. B.; Bakken, V.; Adamo, C.; Jaramillo, J.; Gomperts, R. E.; Stratmann, O.; Yazyev, A. J.; Austin, R. Cammi, C. Pomelli, J. W. Ochterski, R. Martin, R. L., Morokuma, K., Zakrzewski, V. G., Voth, G. A., Salvador, P., Dannenberg, J. J., Dapprich, S., Daniels, A. D., Farkas, O., Foresman, J. B., Ortiz, J. V., Cioslowski, J., and Fox, D. J. Gaussian, Inc., Wallingford CT **2009**.
- Becke, A. D. *Phys. Rev. A At. Mol. Opt. Phys.* **1988**, 38, 3098.
- Perdew, J. P. *Phys. Rev. B Condens. Matter Mater. Phys.* **1986**, 33, 8822.
- Ditchfield, R.; Hehre, W. J.; Pople, J. A. *J. Chem. Phys.* **1971**, 54, 724.
- Hariharan, P. C.; Pople, J. A. *Theor. Chim. Acta* **1973**, 28, 213.
- Hariharan, P. C.; Pople, J. A. *Mol. Phys.* **1974**, 27, 209.
- Francl, M. M.; Pietro, W. J.; Hehre, W. J.; Binkley, J. S.; Gordon, M. S.; DeFrees, D. J.; Pople, J. A. *J. Chem. Phys.* **1982**, 77, 3654.
- Rassolov, V. A.; Pople, J. A.; Ratner, M. A.; Windus, T. L. *J. Chem. Phys.* **1998**, 109, 1223.
- Rassolov, V. A.; Ratner, M. A.; Pople, J. A.; Redfern, P. C.; Curtiss, L. A. *J. Comput. Chem.* **2001**, 22, 976.
- Hehre, W. J.; Ditchfield, R.; Pople, J. A. *J. Chem. Phys.* **1972**, 56, 2257.
- Hehre, W. J.; Ditchfield, R.; Pople, J. A. *J. Chem. Phys.* **1972**, 56, 2257.
- Hariharan, P. C.; Pople, J. A. *Theor. Chim. Acta* **1973**, 28, 213.
- Hariharan, P. C.; Pople, J. A. *Mol. Phys.* **1974**, 27, 209.
- Gordon, M. S. *Chem. Phys. Lett.* **1980**, 76, 163.
- Francl, M. M.; Pietro, W. J.; Hehre, W. J.; Binkley, J. S.; DeFrees, D. J.; Pople, J. A.; Gordon, M. S. *J. Chem. Phys.* **1982**, 77, 3654.
- Binning, R. C. J.; L. A. Curtiss *J. Comput. Chem.* **1990**, 11, 1206.
- Blaudeau, J.-P.; McGrath, M. P.; Curtiss, L. A.; Radom, L. *J. Chem. Phys.* **1997**, 107, 5016.
- Rassolov, V. A.; Ratner, M. A.; Pople, J. A.; Redfern, P. C.; Curtiss, L. A. *J. Comput. Chem.* **2001**, 22, 976.
- Handy, N.C.; Cohen, A.J. *Mol. Phys.*, **2001**, 99, 403.
- Hoe, W.-M.; Cohen, A.J.; Handy, N.C. *Chem. Phys. Lett.*, **2001**, 341, 319.
- Lee, C.; Yang, W.; Parr, R.G. *Phys. Rev. B*, **1988**, 37, 785.
- Miehlich, B.; Savin, A.; Stoll, H.; Preuss, H. *Chem. Phys. Lett.*, **1989**, 157, 200.

**Table S2. Absolute energies (E, Hartree) of studied compounds at the OLYP/6-311+G(d,p) level, for different (HS – high spin, IS – intermediate spin, LS – low spin) states in the presence of solvent (acetone).**

| Compounds                                                                             | HS          | IS          | LS          |
|---------------------------------------------------------------------------------------|-------------|-------------|-------------|
|                                                                                       | E           | E           | E           |
| $[(\text{TMPP})\text{Fe}^{\text{III}}-\text{O}-\text{Cu}^{\text{II}}(\text{tmpa})]^+$ | -6266.15854 | -6266.15260 | –           |
| <b>INIT1</b>                                                                          | -6396.06924 | -6396.07014 | –           |
| <b>TS1</b>                                                                            | -6396.06936 | -6396.06993 | –           |
| <b>mono-NO</b>                                                                        | -6396.08632 | -6396.08955 | -6396.08947 |
| <b>bis-NO</b>                                                                         | -6525.96359 | -6526.02858 | -6526.03250 |
| <b>NO</b>                                                                             | –           | –           | -129.895151 |

**Table S3. Absolute energies (E, Hartree) and zero-point correction energy (ZPE, kcal/mol) of studied compounds at the BP86/6-31G(d) level, for different (HS – high spin, IS – intermediate spin, LS – low spin) states in the presence of solvent (acetone).**

| Compounds                                                                             | HS          |        | IS           |        | LS          |        |
|---------------------------------------------------------------------------------------|-------------|--------|--------------|--------|-------------|--------|
|                                                                                       | E           | ZPE    | E            | ZPE    | E           | ZPE    |
| $[(\text{TMPP})\text{Fe}^{\text{III}}-\text{O}-\text{Cu}^{\text{II}}(\text{tmpa})]^+$ | -6266.00970 | 648.85 | -6266.021454 | 649.37 | –           | –      |
| <b>INIT1</b>                                                                          | -6395.90702 | 652.47 | -6395.925409 | 653.50 | –           | –      |
| <b>TS1</b>                                                                            | -6395.90517 | 652.52 | -6395.923805 | 653    | –           | –      |
| <b>mono-NO</b>                                                                        | -6395.92571 | 655.67 | -6395.94428  | 654.00 | -6395.96122 | 655.55 |
| <b>bis-NO</b>                                                                         | -6525.85606 | 658.31 | -6525.90377  | 659.56 | -6525.90605 | 659.87 |
| <b>NO</b>                                                                             | –           | –      | –            | –      | -129.895151 | 2.70   |

## XYZ Coordinates

NO

2

N -0.62483 -0.00000 0.00000  
O 0.54711 0.00000 0.00000

[(TMPP)Fe<sup>III</sup>-O-Cu<sup>II</sup>(tmpa)]<sup>+</sup>

135

Fe -0.05373 -1.86193 0.08131  
C 2.61924 -2.22350 -1.55535  
C 4.04803 -2.39887 -1.38933  
H 4.77127 -2.46632 -2.20086  
C 4.28455 -2.51253 -0.04429  
H 5.23772 -2.69142 0.45137  
C 3.00175 -2.40947 0.62202  
C 2.82882 -2.55675 2.02081  
C 1.56911 -2.64379 2.66265  
C 1.38831 -2.82795 4.08915  
H 2.18986 -2.89372 4.82354  
C 0.03886 -2.92076 4.31330  
H -0.46858 -3.09267 5.26165  
C -0.61637 -2.76179 3.03117  
C -2.01830 -2.81947 2.84496  
C -2.66140 -2.72701 1.58709  
C -4.09966 -2.73301 1.40812  
H -4.83292 -2.82589 2.20826  
C -4.33768 -2.58422 0.06521  
H -5.30241 -2.53262 -0.43774  
C -3.04741 -2.49163 -0.58701  
C -2.87259 -2.31388 -1.98098  
C -1.61301 -2.19795 -2.61638  
C -1.43287 -2.10925 -4.05086  
H -2.23537 -2.10702 -4.78725  
C -0.08275 -2.05000 -4.28383  
H 0.42414 -1.97490 -5.24488  
C 0.57355 -2.12880 -2.99450  
C 1.97837 -2.13560 -2.81458  
N 1.99153 -2.23690 -0.31583  
N 0.33267 -2.59287 2.03064  
N -2.03011 -2.57881 0.35683  
N -0.37605 -2.20875 -1.98219  
C 1.62965 1.00128 2.68957  
H 1.62106 0.03262 2.18152  
C 2.43973 1.25559 3.80188  
H 3.09366 0.46864 4.18804  
N -0.43510 3.82910 0.68812  
C 0.66336 4.38774 -0.14022  
C 0.81960 3.57900 -1.41423  
C 1.28110 4.12826 -2.61678  
H 1.49448 5.19964 -2.68137  
C 1.46509 3.28350 -3.72224  
H 1.82509 3.68896 -4.67302  
C 1.17504 1.91760 -3.58900  
H 1.30448 1.22152 -4.42225  
C 0.70354 1.44568 -2.35870  
H 0.45308 0.39396 -2.19248  
N 0.52584 2.25627 -1.29098  
O -0.20015 -0.14262 0.28478

Cu -0.31088 1.71869 0.47822  
N 0.80028 1.93255 2.16715  
C 2.39907 2.52877 4.38921  
H 3.02718 2.76630 5.25353  
C 1.54345 3.50000 3.84746  
H 1.48601 4.50539 4.27597  
C 0.75119 3.16441 2.74228  
C -0.26241 4.11597 2.13440  
C -1.77903 4.21294 0.18707  
C -2.80515 3.17404 0.59865  
C -4.15202 3.48038 0.82859  
H -4.49584 4.51734 0.76334  
C -4.55160 1.12769 1.21246  
H -5.20504 0.28370 1.44911  
C -3.18962 0.90271 0.98231  
H -2.74535 -0.09527 1.03358  
N -2.32958 1.90200 0.68167  
C -5.04156 2.43964 1.13735  
H -6.09916 2.65355 1.32089  
H 0.51098 5.46249 -0.35695  
H 1.59497 4.30344 0.44995  
H -2.06911 5.22724 0.52238  
H -1.72207 4.23881 -0.91726  
H 0.01385 5.17276 2.31368  
H -1.24114 3.94997 2.62196  
C -4.09755 -2.26097 -2.84040  
C 4.06345 -2.66088 2.86087  
C 4.34691 -3.81502 3.62137  
H 3.65253 -4.66192 3.59171  
C 5.51019 -3.91852 4.40115  
H 5.69481 -4.83573 4.96662  
C 6.42580 -2.84642 4.43403  
C 6.16136 -1.68396 3.67561  
H 6.87836 -0.85718 3.70938  
C 5.00199 -1.59966 2.90144  
H 4.81138 -0.69205 2.31825  
C 7.89699 -3.99533 5.94114  
H 7.12141 -4.18138 6.70708  
H 8.85446 -3.77373 6.43411  
H 8.00862 -4.89238 5.30425  
C -4.42162 -1.10380 -3.57930  
H -3.76962 -0.22545 -3.51455  
C -5.56952 -1.03993 -4.38588  
H -5.78761 -0.11977 -4.93446  
C -6.42515 -2.15763 -4.46923  
C -6.11376 -3.32714 -3.73998  
H -6.78010 -4.19221 -3.82057  
C -4.96983 -3.37265 -2.94003  
H -4.73642 -4.29046 -2.38927  
C -7.91981 -1.04510 -5.97978  
H -8.08954 -0.17202 -5.32243  
H -8.85446 -1.30020 -6.49967  
H -7.13880 -0.79959 -6.72321  
O 7.58867 -2.83206 5.15677  
O -7.56979 -2.21221 -5.21975  
C -2.87794 -2.99311 4.05924  
C -3.66324 -4.15095 4.23870  
H -3.63432 -4.94204 3.48110  
C -4.47113 -4.32632 5.37409  
H -5.05654 -5.24352 5.47835  
C -4.50893 -3.32261 6.36363



|   |          |          |          |
|---|----------|----------|----------|
| C | -3.73015 | -2.15507 | 6.19947  |
| H | -3.77291 | -1.37976 | 6.97148  |
| C | -2.92803 | -1.99899 | 5.06678  |
| H | -2.33539 | -1.08488 | 4.94994  |
| C | -6.06709 | -4.54870 | 7.71505  |
| H | -6.81833 | -4.66564 | 6.91187  |
| H | -6.57815 | -4.38874 | 8.67537  |
| H | -5.44705 | -5.46249 | 7.77458  |
| C | 2.84484  | -2.08464 | -4.03427 |
| C | 2.79552  | -3.10805 | -5.01287 |
| H | 2.11767  | -3.95668 | -4.86999 |
| C | 3.60844  | -3.06602 | -6.14746 |
| H | 3.57335  | -3.86450 | -6.89581 |
| C | 4.50254  | -1.98919 | -6.34232 |
| C | 4.57031  | -0.96122 | -5.37956 |
| H | 5.24971  | -0.11397 | -5.50497 |
| C | 3.74862  | -1.02115 | -4.24209 |
| H | 3.80397  | -0.21276 | -3.50462 |
| C | 6.17917  | -0.96714 | -7.71968 |
| H | 5.65841  | 0.00513  | -7.80115 |
| H | 6.66937  | -1.20219 | -8.67537 |
| H | 6.93919  | -0.91167 | -6.91836 |
| O | -5.25810 | -3.37998 | 7.50903  |
| O | 5.25216  | -2.03916 | -7.48739 |

### INIT1\_IS

137

Initial complex in acetone

|    |          |          |          |
|----|----------|----------|----------|
| Fe | 0.22176  | -1.83067 | -0.27991 |
| C  | 2.67357  | -1.84956 | -2.06462 |
| C  | 4.05870  | -2.25149 | -2.07368 |
| H  | 4.70494  | -2.23912 | -2.95031 |
| C  | 4.36444  | -2.66594 | -0.80356 |
| H  | 5.31202  | -3.05397 | -0.43283 |
| C  | 3.17451  | -2.48862 | -0.00788 |
| C  | 3.13883  | -2.65632 | 1.38732  |
| C  | 1.96248  | -2.45224 | 2.12964  |
| C  | 1.90603  | -2.48718 | 3.57092  |
| H  | 2.76494  | -2.62844 | 4.22527  |
| C  | 0.59044  | -2.32964 | 3.92257  |
| H  | 0.15650  | -2.33268 | 4.92171  |
| C  | -0.16162 | -2.19868 | 2.69760  |
| C  | -1.56546 | -2.21970 | 2.64349  |
| C  | -2.26302 | -2.25610 | 1.42284  |
| C  | -3.68714 | -2.45676 | 1.31837  |
| H  | -4.35952 | -2.59497 | 2.16395  |
| C  | -4.00160 | -2.43476 | -0.01636 |
| H  | -4.98102 | -2.54574 | -0.47949 |
| C  | -2.77626 | -2.17596 | -0.73161 |
| C  | -2.73412 | -1.87679 | -2.10353 |
| C  | -1.54313 | -1.49902 | -2.74723 |
| C  | -1.47186 | -1.06769 | -4.12052 |
| H  | -2.32775 | -0.94958 | -4.78318 |
| C  | -0.14767 | -0.85098 | -4.40242 |
| H  | 0.29027  | -0.51387 | -5.34084 |
| C  | 0.59977  | -1.21251 | -3.22273 |
| C  | 1.99941  | -1.35909 | -3.19745 |
| N  | 2.11446  | -2.04277 | -0.80089 |
| N  | 0.69369  | -2.22941 | 1.59298  |
| N  | -1.69609 | -2.09045 | 0.15521  |
| N  | -0.26660 | -1.54937 | -2.17920 |
| C  | 0.25199  | 1.56896  | 3.22825  |
| H  | 0.45143  | 0.59479  | 2.77320  |
| C  | 0.54026  | 1.81449  | 4.57418  |

|    |          |          |          |
|----|----------|----------|----------|
| H  | 0.97396  | 1.02021  | 5.18794  |
| N  | -1.03590 | 4.39381  | 0.58581  |
| C  | 0.16418  | 5.09025  | 0.07001  |
| C  | 0.65182  | 4.39552  | -1.18562 |
| C  | 1.29839  | 5.07160  | -2.22723 |
| H  | 1.44267  | 6.15472  | -2.16601 |
| C  | 1.75046  | 4.34037  | -3.33565 |
| H  | 2.25978  | 4.84589  | -4.16201 |
| C  | 1.52858  | 2.95603  | -3.36808 |
| H  | 1.85832  | 2.34337  | -4.21173 |
| C  | 0.86910  | 2.35293  | -2.29160 |
| H  | 0.67736  | 1.27680  | -2.26793 |
| N  | 0.44045  | 3.05076  | -1.21390 |
| O  | 0.45322  | 0.48554  | 0.24469  |
| Cu | -0.50620 | 2.31943  | 0.40437  |
| N  | -0.28702 | 2.50309  | 2.40819  |
| C  | 0.27463  | 3.08782  | 5.09949  |
| H  | 0.50439  | 3.32378  | 6.14323  |
| C  | -0.29341 | 4.05635  | 4.26085  |
| H  | -0.52361 | 5.05994  | 4.63227  |
| C  | -0.57773 | 3.72583  | 2.92845  |
| C  | -1.31315 | 4.68535  | 2.01010  |
| C  | -2.22645 | 4.57470  | -0.27816 |
| C  | -3.17935 | 3.40888  | -0.09230 |
| C  | -4.57037 | 3.56371  | -0.14764 |
| H  | -5.00135 | 4.55717  | -0.30652 |
| C  | -4.78330 | 1.18911  | 0.22113  |
| H  | -5.37399 | 0.27951  | 0.35784  |
| C  | -3.38500 | 1.11907  | 0.26856  |
| H  | -2.87194 | 0.16944  | 0.44185  |
| N  | -2.58600 | 2.20046  | 0.11426  |
| C  | -5.38853 | 2.43454  | 0.00645  |
| H  | -6.47827 | 2.53046  | -0.03021 |
| H  | -0.02484 | 6.16634  | -0.11424 |
| H  | 0.94403  | 5.02026  | 0.85190  |
| H  | -2.73306 | 5.54081  | -0.08899 |
| H  | -1.87686 | 4.59087  | -1.32661 |
| H  | -1.08478 | 5.73805  | 2.26511  |
| H  | -2.39808 | 4.54861  | 2.17452  |
| N  | 1.77261  | 0.60500  | 0.51265  |
| O  | 2.13738  | 1.74441  | 0.79433  |
| C  | -4.00195 | -1.95298 | -2.89830 |
| C  | 4.38951  | -3.04248 | 2.10992  |
| C  | 4.46364  | -4.25300 | 2.83076  |
| H  | 3.59502  | -4.92068 | 2.84965  |
| C  | 5.62954  | -4.63631 | 3.51261  |
| H  | 5.64621  | -5.58797 | 4.05019  |
| C  | 6.75976  | -3.79348 | 3.48769  |
| C  | 6.70150  | -2.57368 | 2.77661  |
| H  | 7.58169  | -1.92237 | 2.77345  |
| C  | 5.53552  | -2.20993 | 2.09921  |
| H  | 5.50237  | -1.25637 | 1.56098  |
| C  | 8.04773  | -5.28880 | 4.85188  |
| H  | 7.31270  | -5.32379 | 5.67741  |
| H  | 9.06608  | -5.30263 | 5.26631  |
| H  | 7.90500  | -6.16634 | 4.19425  |
| C  | -4.62231 | -0.79822 | -3.41582 |
| H  | -4.17779 | 0.18421  | -3.22201 |
| C  | -5.80651 | -0.87219 | -4.16854 |
| H  | -6.25754 | 0.04833  | -4.54831 |
| C  | -6.39727 | -2.12823 | -4.41584 |
| C  | -5.79180 | -3.29500 | -3.89807 |
| H  | -6.25823 | -4.26505 | -4.09896 |
| C  | -4.61384 | -3.20397 | -3.15262 |
| H  | -4.15012 | -4.11842 | -2.76621 |

|   |          |          |          |
|---|----------|----------|----------|
| C | -8.18489 | -1.16669 | -5.69487 |
| H | -8.50913 | -0.46458 | -4.90421 |
| H | -9.06608 | -1.54552 | -6.23247 |
| H | -7.51818 | -0.64044 | -6.40326 |
| O | 7.94810  | -4.06040 | 4.11422  |
| O | -7.54544 | -2.32510 | -5.13732 |
| C | -2.33459 | -2.29485 | 3.92775  |
| C | -3.00611 | -3.47425 | 4.30979  |
| H | -2.96200 | -4.35328 | 3.65703  |
| C | -3.72165 | -3.55801 | 5.51578  |
| H | -4.22348 | -4.49357 | 5.77638  |
| C | -3.77345 | -2.44017 | 6.37356  |
| C | -3.10325 | -1.25177 | 6.00717  |
| H | -3.15293 | -0.38945 | 6.68018  |
| C | -2.39617 | -1.18544 | 4.80385  |
| H | -1.88498 | -0.25507 | 4.53288  |
| C | -5.12647 | -3.59277 | 7.98515  |
| H | -5.92065 | -3.86837 | 7.26648  |
| H | -5.57949 | -3.34947 | 8.95705  |
| H | -4.42848 | -4.44212 | 8.10544  |
| C | 2.79442  | -1.06268 | -4.42853 |
| C | 2.57756  | -1.76846 | -5.63811 |
| H | 1.81558  | -2.55450 | -5.67364 |
| C | 3.33301  | -1.49732 | -6.78047 |
| H | 3.16908  | -2.05325 | -7.70939 |
| C | 4.33544  | -0.50158 | -6.75135 |
| C | 4.57167  | 0.21005  | -5.55705 |
| H | 5.34018  | 0.98570  | -5.50523 |
| C | 3.80756  | -0.08002 | -4.41478 |
| H | 3.99764  | 0.47970  | -3.49236 |
| C | 6.05009  | 0.68623  | -7.93697 |
| H | 5.64462  | 1.69092  | -7.71509 |
| H | 6.46010  | 0.67286  | -8.95705 |
| H | 6.85081  | 0.44419  | -7.21369 |
| O | -4.43658 | -2.40295 | 7.57204  |
| O | 5.01510  | -0.30974 | -7.92416 |

**TS1\_IS**

137

|    |           |           |            |
|----|-----------|-----------|------------|
| Fe | -0.645382 | 0.077981  | -1.339409  |
| C  | -3.525808 | -0.912272 | -1.482112  |
| C  | -4.878476 | -0.413685 | -1.510218  |
| H  | -5.761994 | -1.019227 | -1.705228  |
| C  | -4.811111 | 0.926968  | -1.232023  |
| H  | -5.627915 | 1.643666  | -1.158440  |
| C  | -3.415492 | 1.257223  | -1.1086668 |
| C  | -2.953549 | 2.551626  | -0.781396  |
| C  | -1.600979 | 2.902717  | -0.925737  |
| C  | -1.104081 | 4.253361  | -0.829248  |
| H  | -1.689236 | 5.107905  | -0.492259  |
| C  | 0.180868  | 4.242118  | -1.309906  |
| H  | 0.856763  | 5.085240  | -1.447024  |
| C  | 0.499602  | 2.873207  | -1.630180  |
| C  | 1.723568  | 2.456912  | -2.179837  |
| C  | 2.037349  | 1.095527  | -2.346226  |
| C  | 3.329625  | 0.627061  | -2.776588  |
| H  | 4.133152  | 1.269699  | -3.134568  |
| C  | 3.341880  | -0.735299 | -2.604409  |
| H  | 4.158842  | -1.430252 | -2.794031  |
| C  | 2.045856  | -1.110701 | -2.103094  |
| C  | 1.684123  | -2.426101 | -1.762245  |
| C  | 0.357776  | -2.767544 | -1.441250  |
| C  | -0.096436 | -4.126019 | -1.278357  |

|    |           |           |           |
|----|-----------|-----------|-----------|
| H  | 0.554352  | -4.998740 | -1.247452 |
| C  | -1.467993 | -4.088885 | -1.246679 |
| H  | -2.163222 | -4.923735 | -1.169163 |
| C  | -1.855962 | -2.708007 | -1.383272 |
| C  | -3.191201 | -2.277090 | -1.493901 |
| N  | -2.622456 | 0.135855  | -1.298356 |
| N  | -0.588142 | 2.042669  | -1.357083 |
| N  | 1.232381  | 0.018847  | -1.960741 |
| N  | -0.727490 | -1.887795 | -1.444225 |
| C  | 0.351262  | 2.798922  | 2.741260  |
| H  | -0.063161 | 2.571103  | 1.755343  |
| C  | 0.164438  | 4.051543  | 3.334128  |
| H  | -0.402079 | 4.821280  | 2.802394  |
| N  | 2.135594  | -0.386491 | 4.600700  |
| C  | 1.068796  | -1.055127 | 5.364262  |
| C  | 0.395058  | -2.117859 | 4.512876  |
| C  | -0.130347 | -3.297713 | 5.052887  |
| H  | -0.029348 | -3.499554 | 6.124801  |
| C  | -0.786552 | -4.203265 | 4.204713  |
| H  | -1.207356 | -5.131956 | 4.603647  |
| C  | -0.885426 | -3.894884 | 2.840787  |
| H  | -1.380355 | -4.566500 | 2.133414  |
| C  | -0.329274 | -2.697948 | 2.375893  |
| H  | -0.389424 | -2.409701 | 1.322445  |
| N  | 0.302076  | -1.817525 | 3.188794  |
| O  | -0.106554 | 0.130104  | 1.002243  |
| Cu | 1.164187  | -0.094768 | 2.606744  |
| N  | 1.044312  | 1.796817  | 3.334981  |
| C  | 0.698366  | 4.282273  | 4.609530  |
| H  | 0.553783  | 5.242331  | 5.115622  |
| C  | 1.425651  | 3.254728  | 5.226826  |
| H  | 1.866962  | 3.394522  | 6.219889  |
| C  | 1.596132  | 2.037673  | 4.553916  |
| C  | 2.496239  | 0.943812  | 5.114721  |
| C  | 3.296711  | -1.240568 | 4.294700  |
| C  | 3.967223  | -0.774860 | 3.010864  |
| C  | 5.355160  | -0.813376 | 2.834264  |
| H  | 5.998601  | -1.161951 | 3.649453  |
| C  | 5.031990  | 0.037447  | 0.601112  |
| H  | 5.400279  | 0.367731  | -0.373727 |
| C  | 3.654711  | 0.052581  | 0.856268  |
| H  | 2.941497  | 0.389824  | 0.098490  |
| N  | 3.118464  | -0.338835 | 2.036634  |
| C  | 5.900891  | -0.402441 | 1.607517  |
| H  | 6.983768  | -0.421820 | 1.447046  |
| H  | 1.431622  | -1.487938 | 6.321585  |
| H  | 0.321583  | -0.278028 | 5.617235  |
| H  | 4.029821  | -1.284350 | 5.127729  |
| H  | 2.917248  | -2.269026 | 4.146084  |
| H  | 2.508070  | 0.977732  | 6.224450  |
| H  | 3.531256  | 1.156180  | 4.785493  |
| N  | -1.385153 | 0.359075  | 1.408083  |
| O  | -1.535664 | 0.408816  | 2.623738  |
| C  | 2.708560  | -3.514474 | -1.837697 |
| C  | -3.950081 | 3.574188  | -0.343221 |
| C  | -4.225615 | 4.731302  | -1.100311 |
| H  | -3.707484 | 4.886135  | -2.053303 |
| C  | -5.173530 | 5.676719  | -0.677549 |
| H  | -5.369516 | 6.553376  | -1.300899 |
| C  | -5.868281 | 5.475201  | 0.532984  |
| C  | -5.604828 | 4.319541  | 1.302151  |
| H  | -6.151820 | 4.179741  | 2.239930  |
| C  | -4.666185 | 3.384752  | 0.865106  |
| H  | -4.463056 | 2.494981  | 1.471220  |
| C  | -7.124529 | 7.500993  | 0.294378  |

|                 |           |           |           |    |       |       |       |
|-----------------|-----------|-----------|-----------|----|-------|-------|-------|
| H               | -6.240616 | 8.157278  | 0.179031  | C  | -0.02 | 0.01  | -0.01 |
| H               | -7.895892 | 8.025666  | 0.876644  | C  | -0.02 | 0.00  | -0.02 |
| H               | -7.526753 | 7.247153  | -0.704935 | H  | -0.03 | -0.01 | -0.04 |
| C               | 3.122574  | -4.202635 | -0.679976 | C  | -0.03 | 0.00  | 0.00  |
| H               | 2.697763  | -3.920296 | 0.290340  | H  | -0.04 | 0.00  | 0.00  |
| C               | 4.070381  | -5.237841 | -0.736659 | C  | -0.03 | 0.01  | 0.02  |
| H               | 4.368445  | -5.744656 | 0.185341  | C  | -0.04 | 0.02  | 0.02  |
| C               | 4.625923  | -5.606427 | -1.978746 | C  | -0.05 | 0.02  | 0.00  |
| C               | 4.218821  | -4.929156 | -3.149597 | C  | -0.05 | 0.02  | 0.01  |
| H               | 4.648678  | -5.236776 | -4.108039 | H  | -0.05 | 0.03  | 0.04  |
| C               | 3.274728  | -3.904102 | -3.076186 | C  | -0.06 | 0.01  | -0.02 |
| H               | 2.951964  | -3.402807 | -3.995353 | H  | -0.05 | 0.00  | -0.03 |
| C               | 5.978611  | -7.328937 | -1.008976 | C  | -0.06 | 0.00  | -0.05 |
| H               | 6.473414  | -6.670419 | -0.268923 | C  | -0.06 | 0.01  | -0.07 |
| H               | 6.702348  | -8.069149 | -1.379945 | N  | -0.05 | 0.00  | -0.11 |
| H               | 5.131483  | -7.852786 | -0.525779 | N  | -0.03 | 0.00  | -0.07 |
| O               | -6.809309 | 6.323826  | 1.046277  | N  | -0.03 | 0.01  | 0.01  |
| O               | 5.552524  | -6.595810 | -2.161299 | N  | -0.06 | 0.01  | -0.05 |
| C               | 2.739899  | 3.483894  | -2.572404 | C  | -0.03 | 0.00  | 0.09  |
| C               | 3.052827  | 3.703679  | -3.928790 | H  | -0.02 | 0.00  | 0.09  |
| H               | 2.531355  | 3.124702  | -4.699342 | C  | -0.04 | 0.00  | 0.10  |
| C               | 4.007042  | 4.657260  | -4.318633 | H  | -0.05 | -0.01 | 0.10  |
| H               | 4.214459  | 4.803303  | -5.382080 | N  | 0.04  | 0.02  | 0.04  |
| C               | 4.674569  | 5.417592  | -3.336910 | C  | 0.05  | 0.01  | 0.05  |
| C               | 4.373887  | 5.207469  | -1.972621 | C  | 0.05  | 0.01  | 0.05  |
| H               | 4.906100  | 5.801870  | -1.223097 | C  | 0.05  | 0.00  | 0.04  |
| C               | 3.422368  | 4.255495  | -1.601705 | H  | 0.05  | -0.01 | 0.03  |
| H               | 3.205701  | 4.096138  | -0.539128 | C  | 0.04  | 0.02  | 0.03  |
| C               | 5.954108  | 6.626880  | -4.961505 | H  | 0.04  | 0.01  | 0.01  |
| H               | 6.371232  | 5.726465  | -5.451857 | C  | 0.03  | 0.04  | 0.03  |
| H               | 6.718727  | 7.416854  | -4.936757 | H  | 0.03  | 0.05  | 0.02  |
| H               | 5.075488  | 6.982932  | -5.532544 | C  | 0.03  | 0.04  | 0.04  |
| C               | -4.271381 | -3.303081 | -1.596477 | H  | 0.03  | 0.06  | 0.05  |
| C               | -4.296963 | -4.212762 | -2.683280 | N  | 0.03  | 0.03  | 0.06  |
| H               | -3.524380 | -4.145367 | -3.457045 | O  | 0.36  | 0.02  | 0.04  |
| C               | -5.300416 | -5.174448 | -2.798585 | Cu | 0.09  | 0.02  | 0.12  |
| H               | -5.328844 | -5.866636 | -3.645906 | N  | 0.00  | 0.01  | 0.09  |
| C               | -6.315343 | -5.263292 | -1.819498 | C  | -0.03 | 0.00  | 0.09  |
| C               | -6.304855 | -4.372151 | -0.726530 | H  | -0.03 | 0.00  | 0.09  |
| H               | -7.072102 | -4.424751 | 0.050750  | C  | 0.00  | 0.01  | 0.09  |
| C               | -5.291654 | -3.405785 | -0.627901 | H  | 0.00  | 0.02  | 0.08  |
| H               | -5.284710 | -2.726023 | 0.231459  | C  | 0.01  | 0.02  | 0.08  |
| C               | -8.310489 | -6.357416 | -1.071147 | C  | 0.03  | 0.02  | 0.06  |
| H               | -7.924123 | -6.602606 | -0.063161 | C  | 0.07  | 0.03  | 0.07  |
| H               | -8.941132 | -7.183043 | -1.431486 | C  | 0.08  | 0.01  | 0.06  |
| H               | -8.912138 | -5.429942 | -1.018889 | C  | 0.07  | -0.01 | 0.05  |
| O               | 5.620455  | 6.371536  | -3.592291 | H  | 0.08  | -0.01 | 0.05  |
| O               | -7.249091 | -6.239771 | -2.024829 | C  | 0.06  | -0.05 | 0.03  |
|                 |           |           |           | H  | 0.05  | -0.08 | 0.02  |
|                 |           |           |           | C  | 0.06  | -0.02 | 0.05  |
|                 |           |           |           | H  | 0.05  | -0.03 | 0.05  |
|                 |           |           |           | N  | 0.08  | 0.01  | 0.06  |
|                 |           |           |           | C  | 0.06  | -0.04 | 0.03  |
|                 |           |           |           | H  | 0.06  | -0.06 | 0.02  |
|                 |           |           |           | H  | 0.07  | 0.01  | 0.04  |
|                 |           |           |           | H  | 0.05  | 0.00  | 0.07  |
|                 |           |           |           | H  | 0.05  | 0.06  | 0.08  |
|                 |           |           |           | H  | 0.08  | 0.02  | 0.09  |
|                 |           |           |           | H  | 0.05  | 0.00  | 0.05  |
|                 |           |           |           | H  | 0.02  | 0.04  | 0.04  |
|                 |           |           |           | N  | 0.28  | -0.15 | -0.30 |
|                 |           |           |           | O  | -0.08 | -0.04 | -0.35 |
|                 |           |           |           | C  | -0.04 | 0.01  | 0.02  |
|                 |           |           |           | C  | -0.02 | -0.02 | -0.03 |
|                 |           |           |           | C  | -0.01 | -0.01 | -0.01 |
| NORMALMODES 405 |           |           |           |    |       |       |       |
| Fe              | -0.04     | 0.00      | -0.09     |    |       |       |       |
| C               | -0.05     | 0.00      | -0.09     |    |       |       |       |
| C               | -0.07     | 0.00      | -0.06     |    |       |       |       |
| H               | -0.07     | 0.00      | -0.05     |    |       |       |       |
| C               | -0.06     | 0.00      | -0.06     |    |       |       |       |
| H               | -0.05     | 0.00      | -0.05     |    |       |       |       |
| C               | -0.04     | -0.01     | -0.07     |    |       |       |       |
| C               | -0.03     | -0.02     | -0.05     |    |       |       |       |
| C               | -0.03     | -0.02     | -0.02     |    |       |       |       |
| C               | -0.02     | -0.03     | 0.02      |    |       |       |       |
| H               | -0.02     | -0.04     | 0.06      |    |       |       |       |
| C               | -0.01     | -0.01     | 0.03      |    |       |       |       |
| H               | -0.01     | -0.01     | 0.07      |    |       |       |       |
| C               | -0.02     | 0.00      | -0.03     |    |       |       |       |
| C               | -0.02     | 0.00      | -0.02     |    |       |       |       |

H -0.01 0.00 -0.01  
C 0.00 0.00 0.00  
H 0.01 0.01 0.01  
C 0.00 -0.01 0.00  
C -0.01 -0.02 -0.01  
H -0.01 -0.03 -0.01  
C -0.02 -0.03 -0.03  
H -0.03 -0.04 -0.04  
C 0.01 0.00 0.02  
H 0.01 0.00 0.02  
H 0.01 0.00 0.02  
H 0.01 0.01 0.02  
C -0.03 0.02 0.01  
H -0.02 0.02 0.02  
C -0.03 0.02 0.01  
H -0.02 0.02 0.01  
C -0.04 0.02 0.01  
C -0.05 0.01 0.01  
H -0.05 0.01 0.01  
C -0.05 0.01 0.01  
H -0.06 0.00 0.01  
C -0.02 0.02 0.00  
H -0.02 0.02 0.00  
H -0.02 0.02 0.00  
H -0.02 0.02 0.01  
O 0.01 -0.01 0.01  
O -0.03 0.02 0.00  
C -0.01 0.00 -0.02  
C -0.02 0.02 -0.02  
H -0.03 0.04 -0.02  
C -0.01 0.02 -0.01  
H -0.02 0.03 -0.01  
C 0.00 0.00 0.00  
C 0.00 -0.02 0.00  
H 0.01 -0.03 0.00  
C 0.00 -0.01 -0.01  
H 0.00 -0.03 -0.01  
C 0.00 0.01 0.00  
H -0.01 0.01 -0.01  
H 0.01 0.00 0.01  
H 0.00 0.02 0.01  
C -0.05 0.00 -0.05  
C -0.06 -0.01 -0.04  
H -0.06 -0.01 -0.05  
C -0.05 -0.02 -0.02  
H -0.05 -0.03 -0.02  
C -0.04 -0.02 -0.01  
C -0.03 -0.01 -0.02  
H -0.03 -0.01 -0.01  
C -0.04 0.00 -0.04  
H -0.04 0.01 -0.05  
C -0.02 -0.02 0.01  
H -0.02 -0.01 0.01  
H -0.02 -0.03 0.03  
H -0.03 -0.03 0.01  
O 0.00 0.00 0.00  
O -0.03 -0.03 0.01  
-49.5795

**TS1\_HS**

137

Fe -0.638549 0.168130 -1.105222  
C -3.018175 -1.870703 -1.436591

C -4.463211 -1.941471 -1.354220  
H -5.060000 -2.838697 -1.513321  
C -4.909277 -0.677823 -1.059778  
H -5.939785 -0.345385 -0.940141  
C -3.741475 0.176475 -0.983571  
C -3.800069 1.572643 -0.750197  
C -2.705425 2.456584 -0.907148  
C -2.793210 3.897209 -0.787399  
H -3.682154 4.452621 -0.491308  
C -1.569789 4.405457 -1.146927  
H -1.276596 5.452928 -1.206764  
C -0.710057 3.276918 -1.436975  
C 0.646688 3.381360 -1.827301  
C 1.492248 2.269223 -2.055297  
C 2.899458 2.370698 -2.382272  
H 3.446746 3.301643 -2.524957  
C 3.390076 1.090354 -2.449150  
H 4.413076 0.780350 -2.658666  
C 2.284992 0.196040 -2.172637  
C 2.394539 -1.215343 -2.141070  
C 1.304552 -2.098010 -1.943430  
C 1.392234 -3.535747 -2.074566  
H 2.308188 -4.096518 -2.255960  
C 0.115916 -4.029579 -1.959890  
H -0.200332 -5.070615 -2.013274  
C -0.762798 -2.895835 -1.769198  
C -2.172452 -2.984212 -1.659497  
N -2.595076 -0.563656 -1.237149  
N -1.416101 2.091051 -1.280220  
N 1.128936 0.932115 -1.928720  
N -0.017269 -1.720094 -1.726541  
C 0.064480 2.425563 3.565224  
H -0.388749 2.401720 2.571856  
C -0.198961 3.476885 4.448330  
H -0.866207 4.287703 4.142905  
N 2.261338 -0.890594 4.507090  
C 1.323911 -1.840437 5.145027  
C 0.682940 -2.722596 4.091600  
C 0.286338 -4.040174 4.350347  
H 0.466961 -4.477153 5.337317  
C -0.337305 -4.777279 3.332825  
H -0.657974 -5.808306 3.511409  
C -0.526917 -4.171171 2.082444  
H -0.996043 -4.705996 1.251796  
C -0.094816 -2.853832 1.898509  
H -0.209902 -2.346658 0.936390  
N 0.492422 -2.128265 2.880759  
O 0.071523 0.153899 1.053222  
Cu 1.239332 -0.260897 2.727948  
N 0.881775 1.387093 3.870289  
C 0.396283 3.455756 5.717931  
H 0.199549 4.250546 6.444162  
C 1.255306 2.395964 6.038453  
H 1.750766 2.345870 7.013221  
C 1.491230 1.393100 5.088238  
C 2.524682 0.306239 5.332636  
C 3.497638 -1.527540 3.996778  
C 4.087892 -0.677126 2.885622  
C 5.467561 -0.522938 2.705107  
H 6.164704 -1.015654 3.390053  
C 4.997271 0.890389 0.805846  
H 5.307172 1.524740 -0.028736  
C 3.633489 0.688831 1.052102  
H 2.870515 1.154888 0.421921  
N 3.174586 -0.078339 2.068701

|   |            |           |           |                 |           |           |           |
|---|------------|-----------|-----------|-----------------|-----------|-----------|-----------|
| C | 5.932829   | 0.271428  | 1.645722  | H               | -4.677340 | -8.904798 | -0.319811 |
| H | 7.006856   | 0.410592  | 1.487754  | H               | -5.640014 | -9.709229 | -1.611889 |
| H | 1.813713   | -2.448390 | 5.931501  | H               | -6.177344 | -8.122209 | -0.950938 |
| H | 0.537784   | -1.237990 | 5.638634  | O               | 2.855997  | 8.613578  | -2.387569 |
| H | 4.239025   | -1.705636 | 4.799966  | O               | -4.540620 | -8.138683 | -2.278892 |
| H | 3.216439   | -2.515891 | 3.588421  |                 |           |           |           |
| H | 2.594902   | 0.057268  | 6.409116  |                 |           |           |           |
| H | 3.512480   | 0.706451  | 5.037768  | NORMALMODES 405 |           |           |           |
| N | -1.256870  | 0.279553  | 1.270520  | Fe              | 0.05      | 0.00      | 0.04      |
| O | -1.636941  | 0.125159  | 2.421967  | C               | 0.03      | 0.00      | 0.02      |
| C | 3.740154   | -1.825504 | -2.391135 | C               | 0.03      | 0.00      | 0.00      |
| C | -5.122320  | 2.140686  | -0.337028 | H               | 0.03      | 0.01      | -0.02     |
| C | -5.829941  | 3.057481  | -1.142000 | C               | 0.03      | 0.00      | 0.00      |
| H | -5.410865  | 3.360975  | -2.107822 | H               | 0.03      | 0.01      | -0.01     |
| C | -7.073185  | 3.578250  | -0.746792 | C               | 0.03      | 0.00      | 0.02      |
| H | -7.594115  | 4.278102  | -1.405401 | C               | 0.02      | 0.00      | 0.02      |
| C | -7.634460  | 3.183914  | 0.485244  | C               | 0.02      | 0.00      | 0.02      |
| C | -6.939779  | 2.265297  | 1.303885  | H               | 0.01      | 0.00      | -0.02     |
| H | -7.383549  | 1.970163  | 2.260388  | C               | 0.02      | 0.00      | 0.00      |
| C | -5.707895  | 1.751962  | 0.893013  | H               | 0.01      | 0.00      | -0.02     |
| H | -5.174842  | 1.046359  | 1.539711  | C               | 0.02      | 0.00      | 0.03      |
| C | -9.576103  | 4.558673  | 0.173355  | C               | 0.02      | -0.01     | 0.02      |
| H | -9.006884  | 5.493104  | 0.012552  | C               | 0.02      | -0.01     | 0.01      |
| H | -10.489475 | 4.778775  | 0.744573  | C               | 0.01      | 0.00      | 0.00      |
| H | -9.848857  | 4.120837  | -0.804859 | H               | 0.01      | 0.00      | 0.01      |
| C | 4.399086   | -2.562397 | -1.385706 | C               | 0.02      | 0.00      | -0.01     |
| H | 3.924648   | -2.673233 | -0.404235 | H               | 0.02      | 0.00      | -0.02     |
| C | 5.656401   | -3.149401 | -1.604173 | C               | 0.03      | -0.01     | -0.01     |
| H | 6.135401   | -3.706177 | -0.794563 | C               | 0.03      | -0.01     | -0.02     |
| C | 6.282578   | -3.006046 | -2.859265 | C               | 0.02      | 0.00      | -0.03     |
| C | 5.634559   | -2.274771 | -3.879895 | C               | 0.02      | -0.01     | -0.02     |
| H | 6.125999   | -2.179339 | -4.853695 | H               | 0.02      | -0.01     | -0.01     |
| C | 4.385043   | -1.695979 | -3.645302 | C               | 0.02      | 0.00      | -0.01     |
| H | 3.889339   | -1.143349 | -4.451016 | H               | 0.02      | 0.00      | 0.01      |
| C | 8.191701   | -4.292432 | -2.183925 | C               | 0.03      | 0.00      | -0.02     |
| H | 8.413944   | -3.676010 | -1.292917 | C               | 0.03      | 0.00      | 0.00      |
| H | 9.133443   | -4.615421 | -2.650607 | N               | 0.04      | 0.00      | 0.04      |
| H | 7.606757   | -5.180561 | -1.880352 | N               | 0.03      | -0.01     | 0.05      |
| O | -8.834877  | 3.625771  | 0.975234  | N               | 0.03      | -0.01     | 0.01      |
| O | 7.504085   | -3.531494 | -3.188943 | N               | 0.03      | 0.00      | -0.04     |
| C | 1.229346   | 4.750952  | -1.997859 | C               | 0.06      | 0.05      | -0.08     |
| C | 1.652936   | 5.205278  | -3.264131 | H               | 0.11      | 0.08      | -0.11     |
| H | 1.542126   | 4.548927  | -4.134575 | C               | 0.03      | 0.03      | -0.07     |
| C | 2.200869   | 6.486007  | -3.443789 | H               | 0.05      | 0.04      | -0.07     |
| H | 2.508594   | 6.801051  | -4.444288 | N               | -0.02     | 0.00      | -0.04     |
| C | 2.337602   | 7.346451  | -2.335307 | C               | -0.02     | 0.00      | -0.04     |
| C | 1.921788   | 6.906571  | -1.058601 | C               | -0.01     | 0.00      | -0.04     |
| H | 2.041007   | 7.580438  | -0.203834 | C               | -0.01     | 0.00      | -0.03     |
| C | 1.376656   | 5.630453  | -0.897919 | H               | -0.02     | 0.01      | -0.02     |
| H | 1.068949   | 5.300323  | 0.100423  | C               | -0.01     | 0.00      | -0.02     |
| C | 3.293082   | 9.098243  | -3.666931 | H               | -0.01     | 0.00      | -0.02     |
| H | 4.107400   | 8.472770  | -4.077610 | C               | -0.01     | -0.01     | -0.03     |
| H | 3.667769   | 10.115872 | -3.485235 | H               | -0.02     | -0.01     | -0.02     |
| H | 2.457459   | 9.136114  | -4.390326 | C               | -0.01     | -0.01     | -0.03     |
| C | -2.804216  | -4.334606 | -1.791687 | H               | -0.03     | 0.00      | -0.03     |
| C | -2.684794  | -5.081053 | -2.990040 | N               | 0.00      | 0.00      | -0.04     |
| H | -2.132075  | -4.655983 | -3.834918 | O               | -0.40     | -0.03     | -0.06     |
| C | -3.274249  | -6.339980 | -3.122103 | Cu              | -0.05     | 0.00      | -0.06     |
| H | -3.188162  | -6.907631 | -4.054399 | N               | 0.04      | 0.03      | -0.08     |
| C | -4.004291  | -6.899803 | -2.049382 | C               | -0.02     | 0.00      | -0.05     |
| C | -4.135268  | -6.175076 | -0.847142 | H               | -0.04     | -0.02     | -0.03     |
| H | -4.689025  | -6.584925 | 0.001512  | C               | -0.03     | -0.01     | -0.04     |
| C | -3.540937  | -4.907509 | -0.732931 | H               | -0.06     | -0.03     | -0.03     |
| H | -3.645303  | -4.356762 | 0.208572  | C               | 0.00      | 0.01      | -0.06     |
| C | -5.300314  | -8.740270 | -1.218658 | C               | -0.02     | 0.00      | -0.04     |

C -0.03 0.00 -0.05  
 C -0.04 0.00 -0.04  
 C -0.03 0.01 -0.03  
 H -0.04 0.01 -0.02  
 C -0.02 0.02 -0.02  
 H -0.02 0.03 -0.01  
 C -0.03 0.01 -0.04  
 H -0.02 0.01 -0.04  
 N -0.04 0.00 -0.05  
 C -0.03 0.02 -0.02  
 H -0.03 0.03 -0.01  
 H -0.02 0.01 -0.03  
 H -0.02 0.00 -0.04  
 H -0.03 -0.01 -0.05  
 H -0.04 0.00 -0.05  
 H -0.03 0.00 -0.04  
 H -0.01 -0.01 -0.03  
 N -0.36 0.05 0.42  
 O 0.11 -0.06 0.55  
 C 0.03 0.00 -0.01  
 C 0.02 0.00 0.00  
 C 0.02 0.00 0.00  
 H 0.02 0.00 0.00  
 C 0.02 0.00 -0.01  
 H 0.02 -0.01 -0.01  
 C 0.01 0.00 -0.01  
 C 0.01 0.00 -0.01  
 H 0.00 0.00 -0.01  
 C 0.01 0.00 0.00  
 H 0.00 0.00 0.00  
 C 0.01 0.00 -0.01  
 H 0.01 0.00 -0.01  
 H 0.01 0.00 -0.02  
 H 0.01 0.00 -0.02  
 C 0.02 0.00 -0.01  
 H 0.02 0.00 -0.01  
 C 0.02 0.00 0.00  
 H 0.02 0.00 0.00  
 C 0.02 -0.01 0.00  
 C 0.03 -0.01 -0.01  
 H 0.03 -0.01 -0.01  
 C 0.03 -0.01 -0.01  
 H 0.03 -0.01 -0.01  
 C 0.02 -0.01 0.00  
 H 0.02 -0.01 0.00  
 H 0.02 -0.01 0.01  
 H 0.02 -0.01 0.00  
 O 0.01 0.00 -0.01  
 O 0.02 -0.01 0.00  
 C 0.02 -0.01 0.01  
 C 0.01 -0.01 0.01  
 H 0.01 -0.01 0.01  
 C 0.00 -0.01 0.00  
 H 0.00 -0.01 0.00  
 C 0.00 0.00 0.00  
 C 0.00 0.00 0.00  
 H 0.00 0.01 0.00  
 C 0.01 0.00 0.00  
 H 0.01 0.00 0.01  
 C 0.00 0.00 -0.01  
 H 0.00 0.00 0.00  
 H 0.00 0.00 -0.01  
 H 0.00 -0.01 -0.01  
 C 0.02 0.00 0.00  
 C 0.02 0.00 0.00

H 0.02 0.00 0.00  
 C 0.01 0.00 0.00  
 H 0.01 0.00 0.00  
 C 0.01 0.01 0.00  
 C 0.01 0.01 0.00  
 H 0.01 0.01 0.00  
 C 0.01 0.01 0.00  
 H 0.01 0.01 0.00  
 C 0.00 0.01 0.00  
 H 0.00 0.01 0.00  
 H 0.00 0.01 0.00  
 H 0.00 0.01 0.00  
 O 0.00 0.00 -0.01  
 O 0.00 0.01 0.00  
 -82.9500

**mono-NO LS**

137

Final complex in acetone

Fe 0.17437 -2.30689 -0.21933  
 C 2.88849 -2.56758 -1.56501  
 C 4.25724 -2.93830 -1.29179  
 H 5.03843 -3.03346 -2.04460  
 C 4.34479 -3.17310 0.05316  
 H 5.21394 -3.49418 0.62548  
 C 3.03590 -2.91964 0.60960  
 C 2.76652 -2.92672 1.98733  
 C 1.48054 -2.68614 2.49927  
 C 1.18997 -2.56587 3.90991  
 H 1.93044 -2.63087 4.70585  
 C -0.16067 -2.37693 4.02346  
 H -0.75290 -2.26940 4.93130  
 C -0.69902 -2.38249 2.68315  
 C -2.07371 -2.35242 2.40126  
 C -2.56802 -2.51084 1.09582  
 C -3.97200 -2.63400 0.78075  
 H -4.77887 -2.61551 1.51194  
 C -4.06422 -2.77446 -0.57758  
 H -4.96167 -2.88840 -1.18415  
 C -2.71916 -2.69141 -1.10051  
 C -2.44171 -2.59321 -2.47346  
 C -1.14917 -2.34297 -2.96325  
 C -0.85016 -2.11607 -4.35822  
 H -1.58762 -2.09388 -5.15908  
 C 0.50417 -1.94373 -4.45309  
 H 1.09402 -1.74732 -5.34718  
 C 1.04365 -2.13000 -3.12577  
 C 2.41670 -2.24768 -2.84950  
 N 2.12022 -2.60856 -0.39968  
 N 0.31823 -2.55767 1.74100  
 N -1.79113 -2.55967 -0.06433  
 N 0.01722 -2.33001 -2.19805  
 C -0.19153 1.87645 2.55991  
 H 0.17758 0.88728 2.27834  
 C -0.09602 2.35012 3.87352  
 H 0.33174 1.70914 4.64930  
 N -1.22906 4.17273 -0.61523  
 C 0.08890 4.79135 -0.91087  
 C 0.86880 3.91134 -1.86834  
 C 1.80015 4.41857 -2.78232  
 H 1.96198 5.49840 -2.85416  
 C 2.51190 3.52230 -3.59356  
 H 3.24630 3.89366 -4.31502  
 C 2.25727 2.14846 -3.47260



|    |          |          |          |   |          |          |          |
|----|----------|----------|----------|---|----------|----------|----------|
| C  | 0.08313  | 2.23358  | 2.40363  | C | -5.63928 | -2.93048 | -5.34110 |
| H  | 0.40464  | 1.21882  | 2.15654  | C | -5.25432 | -4.00737 | -4.51151 |
| C  | 0.30682  | 2.77904  | 3.67250  | H | -5.78894 | -4.95883 | -4.59976 |
| H  | 0.79258  | 2.17512  | 4.44410  | C | -4.20453 | -3.85386 | -3.60291 |
| N  | -1.21229 | 4.38481  | -0.79483 | H | -3.91217 | -4.70008 | -2.97128 |
| C  | 0.08554  | 4.92928  | -1.24725 | C | -7.09711 | -2.11599 | -7.06370 |
| C  | 0.75916  | 3.95618  | -2.19830 | H | -7.45664 | -1.24472 | -6.48512 |
| C  | 1.59578  | 4.37830  | -3.23813 | H | -7.92451 | -2.52701 | -7.65989 |
| H  | 1.75191  | 5.44815  | -3.40814 | H | -6.27900 | -1.79863 | -7.73685 |
| C  | 2.22068  | 3.41787  | -4.04723 | O | 7.01157  | -3.90278 | 5.73093  |
| H  | 2.87962  | 3.72591  | -4.86492 | O | -6.67814 | -3.18234 | -6.19794 |
| C  | 1.97357  | 2.06095  | -3.79509 | C | -3.00535 | -2.05673 | 3.50470  |
| H  | 2.43137  | 1.27295  | -4.39954 | C | -3.91240 | -3.07367 | 3.86641  |
| C  | 1.11711  | 1.71540  | -2.74468 | H | -3.90977 | -4.01888 | 3.31216  |
| H  | 0.88495  | 0.66976  | -2.52518 | C | -4.81130 | -2.91425 | 4.93410  |
| N  | 0.51851  | 2.63602  | -1.95010 | H | -5.49271 | -3.73100 | 5.18611  |
| O  | -0.71696 | 0.27277  | -0.34538 | C | -4.81397 | -1.71081 | 5.66875  |
| Cu | -0.83739 | 2.29081  | -0.52436 | C | -3.91065 | -0.68180 | 5.32036  |
| N  | -0.51325 | 2.92147  | 1.39736  | H | -3.92487 | 0.24984  | 5.89552  |
| C  | -0.08744 | 4.10200  | 3.91863  | C | -3.02183 | -0.85731 | 4.25693  |
| H  | 0.08270  | 4.56687  | 4.89475  | H | -2.32967 | -0.04901 | 3.99573  |
| C  | -0.69777 | 4.82423  | 2.88373  | C | -6.57195 | -2.46442 | 7.11677  |
| H  | -1.01593 | 5.86130  | 3.03035  | H | -7.27732 | -2.70059 | 6.29847  |
| C  | -0.90696 | 4.20235  | 1.64601  | H | -7.12619 | -2.04948 | 7.97098  |
| C  | -1.64470 | 4.90327  | 0.51780  | H | -6.04853 | -3.38709 | 7.42915  |
| C  | -2.27293 | 4.43903  | -1.82405 | C | 3.50069  | -1.92493 | -3.93778 |
| C  | -3.29319 | 3.34014  | -1.57953 | C | 3.56181  | -2.84437 | -5.01395 |
| C  | -4.64777 | 3.48381  | -1.90275 | H | 2.86861  | -3.69222 | -5.03822 |
| H  | -5.01217 | 4.43184  | -2.31065 | C | 4.50475  | -2.70386 | -6.03433 |
| C  | -5.00036 | 1.21296  | -1.16294 | H | 4.55469  | -3.42362 | -6.85791 |
| H  | -5.63748 | 0.34387  | -0.97795 | C | 5.42374  | -1.63056 | -6.01173 |
| C  | -3.63651 | 1.14842  | -0.85523 | C | 5.38300  | -0.70553 | -4.94836 |
| H  | -3.18678 | 0.24488  | -0.43366 | H | 6.08008  | 0.13538  | -4.90479 |
| N  | -2.78992 | 2.18657  | -1.05626 | C | 4.43125  | -0.86420 | -3.92740 |
| C  | -5.51751 | 2.40213  | -1.69611 | H | 4.40944  | -0.14016 | -3.10532 |
| H  | -6.58056 | 2.49175  | -1.94075 | C | 7.26983  | -0.51692 | -7.06375 |
| H  | -0.01585 | 5.93170  | -1.70817 | H | 6.77698  | 0.47198  | -7.10935 |
| H  | 0.72063  | 5.04733  | -0.34903 | H | 7.87205  | -0.66898 | -7.97098 |
| H  | -2.75992 | 5.43262  | -1.87393 | H | 7.92451  | -0.56160 | -6.17369 |
| H  | -1.78981 | 4.26599  | -2.80409 | O | -5.64169 | -1.44203 | 6.72691  |
| H  | -1.53062 | 6.00279  | 0.59160  | O | 6.30606  | -1.58195 | -7.05754 |
| H  | -2.72484 | 4.68612  | 0.61809  |   |          |          |          |
| N  | 0.34845  | -4.15589 | -0.46592 |   |          |          |          |
| O  | 0.90478  | -5.11455 | -0.87900 |   |          |          |          |
| N  | 0.31777  | -0.42834 | -0.06165 |   |          |          |          |
| O  | 1.34846  | 0.13213  | 0.33192  |   |          |          |          |
| C  | -3.50175 | -2.62941 | -3.49262 |   |          |          |          |
| C  | 3.91352  | -3.15018 | 2.98321  |   |          |          |          |
| C  | 3.88535  | -4.32561 | 3.76309  |   |          |          |          |
| H  | 3.05881  | -5.03373 | 3.63645  |   |          |          |          |
| C  | 4.89761  | -4.62157 | 4.68984  |   |          |          |          |
| H  | 4.84091  | -5.54861 | 5.26628  |   |          |          |          |
| C  | 5.97180  | -3.72363 | 4.85775  |   |          |          |          |
| C  | 6.01392  | -2.53877 | 4.08881  |   |          |          |          |
| H  | 6.84748  | -1.84414 | 4.23563  |   |          |          |          |
| C  | 5.00107  | -2.26169 | 3.16782  |   |          |          |          |
| H  | 5.04115  | -1.33170 | 2.59018  |   |          |          |          |
| C  | 7.00290  | -5.09117 | 6.53772  |   |          |          |          |
| H  | 6.10994  | -5.12915 | 7.18896  |   |          |          |          |
| H  | 7.90830  | -5.03300 | 7.15884  |   |          |          |          |
| H  | 7.04196  | -6.00279 | 5.91291  |   |          |          |          |
| C  | -3.90331 | -1.56325 | -4.32337 |   |          |          |          |
| H  | -3.39073 | -0.59818 | -4.24574 |   |          |          |          |
| C  | -4.95798 | -1.70008 | -5.24101 |   |          |          |          |
| H  | -5.24159 | -0.84624 | -5.86190 |   |          |          |          |

(TMPP)Fe<sup>II</sup>(NO)

95

|    |           |           |           |
|----|-----------|-----------|-----------|
| Fe | -0.022283 | 0.025569  | 0.170534  |
| C  | 2.995722  | -0.038785 | 0.094107  |
| C  | 4.142632  | 0.829757  | 0.064419  |
| H  | 5.163409  | 0.515156  | 0.221960  |
| C  | 3.687326  | 2.082146  | -0.205030 |
| H  | 4.262170  | 2.990937  | -0.303561 |
| C  | 2.253922  | 1.999327  | -0.299248 |
| C  | 1.427030  | 3.116177  | -0.455927 |
| C  | 0.033865  | 3.044867  | -0.348610 |
| C  | -0.830984 | 4.195243  | -0.380686 |
| H  | -0.506726 | 5.211519  | -0.547044 |
| C  | -2.092786 | 3.749602  | -0.142160 |
| H  | -2.999521 | 4.331962  | -0.075407 |
| C  | -2.018383 | 2.316232  | -0.026264 |
| C  | -3.138420 | 1.488286  | 0.109393  |
| C  | -3.059510 | 0.092813  | 0.029877  |
| C  | -4.214098 | -0.757617 | -0.102481 |



H -5.238331 -0.415439 -0.096427  
 C -3.755862 -2.024533 -0.282929  
 H -4.332372 -2.922812 -0.445822  
 C -2.318941 -1.964133 -0.221489  
 C -1.487914 -3.086705 -0.303176  
 C -0.098347 -3.005424 -0.170247  
 C 0.764612 -4.154326 -0.097851  
 H 0.438167 -5.179735 -0.186672  
 C 2.026276 -3.692991 0.112717  
 H 2.935255 -4.267088 0.214602  
 C 1.949474 -2.256846 0.151978  
 C 3.068973 -1.424712 0.268635  
 N 1.840072 0.690782 -0.118801  
 N -0.706702 1.895852 -0.143664  
 N -1.902712 -0.657316 -0.047188  
 N 0.642335 -1.844744 -0.024577  
 O 0.120438 0.029165 1.983374  
 O 0.932479 -0.343465 2.772123  
 C -2.107803 -4.433722 -0.502276  
 C 2.070607 4.444801 -0.701925  
 C 2.068414 5.452728 0.270259  
 H 1.589259 5.270134 1.228136  
 C 2.678708 6.689655 0.045655  
 H 2.659275 7.440146 0.827244  
 C 3.310696 6.937276 -1.179528  
 C 3.322940 5.936945 -2.164433  
 H 3.813347 6.141827 -3.111273  
 C 2.713425 4.711836 -1.924468  
 H 2.729362 3.948593 -2.697586  
 C 3.958389 9.153240 -0.545012  
 H 2.944124 9.482817 -0.289544  
 H 4.499653 9.976123 -1.013953  
 H 4.481946 8.846415 0.368444  
 C -1.916301 -5.140883 -1.695834  
 H -1.317714 -4.699107 -2.487757  
 C -2.483331 -6.401432 -1.901009  
 H -2.315069 -6.911304 -2.842355  
 C -3.261553 -6.982489 -0.891958  
 C -3.461288 -6.288002 0.311818  
 H -4.061138 -6.751485 1.089189  
 C -2.892458 -5.034427 0.499139  
 H -3.050302 -4.513780 1.439515  
 C -3.685598 -8.957802 -2.177275  
 H -4.093982 -8.428280 -3.046436  
 H -4.237119 -9.886930 -2.027144  
 H -2.627826 -9.186342 -2.354661  
 O 3.936262 8.102809 -1.508829  
 O -3.860511 -8.203869 -0.979765  
 C -4.490104 2.109596 0.271650  
 C -5.193031 1.974755 1.475343  
 H -4.742344 1.425541 2.297432  
 C -6.460347 2.536194 1.652353  
 H -6.966410 2.413579 2.602752  
 C -7.053672 3.249040 0.603076  
 C -6.364955 3.388740 -0.612441  
 H -6.838760 3.936358 -1.421504  
 C -5.104369 2.826684 -0.771406  
 H -4.589752 2.935685 -1.721962  
 C -9.031946 3.718583 1.867752  
 H -9.247738 2.669466 2.103057  
 H -9.967723 4.250352 1.690161  
 H -8.505430 4.179777 2.711967  
 C 4.398088 -2.058828 0.531317  
 C 4.666174 -2.661369 1.774220  
 H 3.903581 -2.650370 2.547945

C 5.891331 -3.262689 2.032934  
 H 6.097065 -3.721305 2.995387  
 C 6.890827 -3.283069 1.047237  
 C 6.642051 -2.692152 -0.198036  
 H 7.391685 -2.698986 -0.980712  
 C 5.404935 -2.089412 -0.441568  
 H 5.221341 -1.643337 -1.415111  
 C 9.107000 -3.949720 0.433597  
 H 8.800431 -4.501999 -0.462872  
 H 9.930065 -4.475573 0.919447  
 H 9.436181 -2.943904 0.146190  
 O -8.282432 3.836491 0.660511  
 O 8.056548 -3.897510 1.396113

[(tmpa)Cu<sup>II</sup>(NO<sub>2</sub>)<sup>+</sup>

44

C 1.777276 -2.540808 0.888299  
 H 1.333709 -2.579644 1.875153  
 C 2.683553 -3.505088 0.459913  
 H 2.974788 -4.306497 1.129695  
 N 0.101618 0.239174 -1.516887  
 C -0.990768 -0.576704 -2.106883  
 C -2.240151 -0.466233 -1.260553  
 C -3.521996 -0.596580 -1.788363  
 H -3.658709 -0.746635 -2.853979  
 C -4.614058 -0.529037 -0.923620  
 H -5.623588 -0.628450 -1.309663  
 C -4.391421 -0.321865 0.437471  
 H -5.213140 -0.254650 1.141621  
 C -3.081101 -0.192714 0.885714  
 H -2.853789 -0.023382 1.931905  
 N -2.027778 -0.268710 0.056418  
 O -0.079340 0.029224 2.449548  
 Cu -0.018795 -0.024587 0.521278  
 N 1.381551 -1.523116 0.103030  
 C 3.187801 -3.421385 -0.837232  
 H 3.887881 -4.163190 -1.208443  
 C 2.772579 -2.373682 -1.657741  
 H 3.137550 -2.279493 -2.675074  
 C 1.876263 -1.436836 -1.149299  
 C 1.445124 -0.225284 -1.944066  
 C -0.081321 1.690722 -1.779428  
 C 0.640898 2.510106 -0.732658  
 C 1.151440 3.780455 -0.985954  
 H 1.085956 4.205757 -1.981856  
 C 1.808452 3.899208 1.326200  
 H 2.260975 4.414755 2.165918  
 C 1.285313 2.620686 1.495254  
 H 1.308522 2.110021 2.451821  
 N 0.715327 1.941776 0.486908  
 C 1.741797 4.486127 0.062749  
 H 2.147452 5.478495 -0.107176  
 H -1.183741 -0.287299 -3.146440  
 H -0.654436 -1.619518 -2.115078  
 H 0.247926 1.949760 -2.792225  
 H -1.153556 1.906524 -1.720725  
 H 1.469164 -0.423841 -3.021680  
 H 2.150725 0.589924 -1.750019  
 N -0.506911 -0.954104 3.190115  
 O -0.853581 -1.964382 2.587114
